# Supplementary material for: Integrated Metabolomic and Transcriptomic Analysis of the Quinoa Seedling Response to High Relative Humidity Stress
Source: Biomolecules. 2023 Sep 5;13(9):1352. doi: 10.3390/biom13091352 (PMC10527060; doi:10.3390/biom13091352)
Supplement: Supplementary file 1 [file biomolecules-13-01352-s001.zip › biomolecules-2566255-supplementary.xlsx]

## Sheet: TableS1
Table S1.Specific primer pairs for selected genes
Gene-ID	Primer	5' to 3'	Nucleotide sequence	Protein sequence	Function description
gene-LOC110690396	Forward Primer	CCAGACCGTGTTAAGTATT	ATGGCCTCCTCAACAATGGCTCTTTCTTCCCCTTCTTTGGCCGGACAGGCAATTAAACATAGCTCCGCCT CTGAATTAAACATCCTAGGTGGGGGAAGGATCACCATGAGGAAAGCTGCAGCAAAGCCCAAAAATGTATC ATCAGGAAGCCCATGGTACGGCCCAGACCGTGTTAAGTATTTGGGCCCATTCTCAGGTGAGGCCCCATCA TACCTCACTGGTGAATTTCCTGGTGACTATGGTTGGGACACAGCGGGCCTATCCGCTGACCCAGAGACCT TTGCTAAGAACCGTGAGCTTGAGGTGATCCACTGCAGATGGGCCATGTTGGGTGCATTGGGCTGTGTTTT CCCCGAGCTATTGGCCCGTAATGGTGTTAAGTTCGGCGAGGCCG…		LCCI1 type chlorophyll A-B binding protein
	Reverse Primer	AACCATAGTCACCAGGAA
gene-LOC110728856	Forward Primer	TCGACTAGACAAACTCAGTCCG	ATGGCAAACACAAAAGCTTTTCTTGTTGTTATTCTCTTCGCTGCACTTCTTATCAGTTCCTATGAGGTCT CAGCTCGTGAGATTGCTGACCCTCAGTCGACTAGACAAACTCAGTCCGTGCAGGAGTCAAAGCAGTCGTA TGCAGGAGGAGGTTATGATAATCCAGGAGGATATGGTAACCCAGGAGGTTATGGTAATCCAGGAGGTTAT CCAGGAGGTTTTGGTAATCCAGGAGGAGGTTATCCAAACCCACCCCCGAGACAAAAGATGGCTAAGGTTG TTGAGGAAAAGCGTAACTAA MANTKAFLVVILFAALLISSYEVSAREIADPQSTRQTQSVQESKQSYAGGGYDNPGGYGNPGGYGNPGGY PGGFGNPGGGYPNPPPRQKMAKV…		MADS transcription factors, dormancy-associated proteins
	Reverse Primer	AAACCTCCTGGATAACCTCCTG
gene-LOC110707197	Forward Primer	TTACTTCATTGTCGTCTC	ATGCCGACGTTTCTAAAATTCTCTCCCATATATTTCACTTTCCTCTTCACTTACTTCACCTTCACTACCG CCACCGACTTTCCACCATGCAACGCCCAGGACAAGACCGTCCTACTAAAAGTCCGCGATCATTTCGGCGG CCCAAACGGCCGCCTCTCGGACTGGGAAAACGACACAGACTGTTGTTCAGAATGGAGTTTCGTGGGGTGT GGCACGAGCGGCAGTGCATACGGCCGCATCAATACTGTCACATTCAGCCGCTCATGGGGCCTTTCAGGTA CCATACCTCCAGACTTCGGTGATTTGCCTTACCTCGGTTTTTTCATTCTAGCAGATAACATCAACGTCAC AGGGACTATCCCCAAGTCCTTTGGCAAGCTCAAGAATCTCTACC…	MPTFLKFSPIYFTFLFTYFTFTTATDFPPCNAQDKTVLLKVRDHFGGPNGRLSDWENDTDCCSEWSFVGC GTSGSAYGRINTVTFSRSWGLSGTIPPDFGDLPYLGFFILADNINVTGTIPKSFGKLKNLYHVELDTNSL TGPILNELFKLKKLKEVDLSANQLSGPIPPSVTSLSSLSQFNISHNKLSGSIPPMPKSLKSIDVSYNQLC GPIPSGLKGFKRASFEHNKCLCGPPLAAGCK	Polygalactosidase inhibitor whose protein is a defence protein in plant cell walls
	Reverse Primer	TAACTCACATCAATACTCTT
gene-LOC110719788	Forward Primer	CATACCTGTCTCAGGCGGAT	ATGGATCCATCTAAGCACCGGCCAGCAAGTGCTTACAACGCCCCATACTTGACTACAAATAATGGTACAC CCGTTTGGAACGATACCTCAGCGTTAACTGTTGGCCCTAGAGGTCCAATTCTGTTGGAGGATTATCATCT GATTGAAAAGATAGCAACTTGGACACATGAACGGATACCTGAACGTGTTGTACATGCTAGGGGAGCAAGT GCTAAGGGTTTTTTTGAAGTTACCCATGATATCACTCACCTCACTTGTGCTGATTTCCTCCGTGCCCCCG GCGTCCAGACCCCTGTTATTGTTCGATTTTCCACGGTCATTCATGAACGTGGTAGTCCTGAAACACTCAG AGATCCTCGTGGTTTCGCCGTCAAGTTCTATACTAGAGAGGGTA…	MDPSKHRPASAYNAPYLTTNNGTPVWNDTSALTVGPRGPILLEDYHLIEKIATWTHERIPERVVHARGAS AKGFFEVTHDITHLTCADFLRAPGVQTPVIVRFSTVIHERGSPETLRDPRGFAVKFYTREGNFDIVGNNF PVFFTRDAMQFFDLIRAFKPNPKSHIQESWRYMDFCSYLPESLNTFTFFFDDVGIPINYRHMNGSGVHTF TLINKAGKVTYVKFHWRPTCGEKNLLEEEAIRVGGSNHSHATQDLYESIANGNFPEWKLYIQTMDPADED KFDFDPLDTTKTWPEDILPLQPVGRLVLNKNVDNFFTENEQLAFDPAHIVPGIYFSNDKMLQARTFAYAD THRYRLGVNYLQLPVNAPKCPHTNMHRDGAMTMVHRDEEIDYFP…	Catalase
	Reverse Primer	CTCCTCAGTACACGCTCACG
gene-LOC110735743	Forward Primer	GACAAATATTATTCTGCCAAGGTGA	ATGGGAAAGTTTGGAGGAATGGCTTCTATTGTAGCCACTCTAGTAGTGTTTGTCTCATTGAGTGTGCCTT CTTTAACCACGGCTGATTACACATATTCCTCTCCACCACCACCAGCCTACCATTACTCCTCCCCACCACC TCCGGTCCATCACGAGAAGCCACCCAAGTACCATTATTCACCTCCATCGAAAACACCTACTTACAAGTCA CCACCGCCTTCCCCAGTTTACAAATCTCCACCACCTCCTGTTCATGGGTATCCAACACCGTCACCAGTGT ACAAGTCTCCACCTGTACACAAGTATCCACCACCAACTCCTGTTTACAAGTCTCCCCCAGTTCATGAATA CCCACCACCCACCCCAGTGTACAAGTCTCCCCCAGTTCATGAAT…	MGKFGGMASIVATLVVFVSLSVPSLTTADYTYSSPPPPAYHYSSPPPPVHHEKPPKYHYSPPSKTPTYKS PPPSPVYKSPPPPVHGYPTPSPVYKSPPVHKYPPPTPVYKSPPVHEYPPPTPVYKSPPVHEYPPPTPVYK SPPVHEYPPPTPVYKSPPVHKYPPPTPVYKSPPVHEYPPPTPVYKSPPVHKYPPPTPVYKSPPVHEYPPP TPVYKSPPVHKYPPPTPVYKSPPVHEYPPPTSVYKSPPVHKYPPPTPVYKSPPVHEYPPPTPTYKSPPVH KYPPPTPVYKSPPVHEYPPPTPVYKSPPVHKYPPPTPVYKSPPVHKSPPSPAHGYPSPSPVHKSPPMHPT PPYVYTSPPPPYHY	Extensin (LRXS), a role in cell wall development
	Reverse Primer	TTTCGACAAAGATAGGTCCTCTAC
gene-LOC110717340	Forward Primer	TGGTTGTGTTACTGGTGAT	ATGGCTTCAACTGTGATTTACAATTCATTAACAACCTCAACAACCGTTTTCTTAAGAACCCACTTACCAA CAATAATCACATCTTCAAACGATGAACATCAACCTTCTTCATTGATATGTAACTGTAAATACTTGTTAAA AAAGTCAACTTTTAGTGGGCAAAGAAAGAAAAAAGACAACTATGTCAAGGCCACAGCAGTGGCGGAGTCC TTTAAAACAACCCCGGCAGCCCAAAATGAGGTTGACGGAGGTTTACCGGAGAAAAAGCTCCGGATACTAG TAGCCGGAGGTGGGATCGGAGGGCTGGTGTTTGCGTTGGCGGCGAAGAAGAAGGGATTTGATGTGGTGGT GTTTGAGAAGGATTTGAGTGCAATAAGAGGAGAAGGGCAATACA…	MASTVIYNSLTTSTTVFLRTHLPTIITSSNDEHQPSSLICNCKYLLKKSTFSGQRKKKDNYVKATAVAES FKTTPAAQNEVDGGLPEKKLRILVAGGGIGGLVFALAAKKKGFDVVVFEKDLSAIRGEGQYRGPIQIQSN ALAALEAIDMDVAEKVMAAGCVTGDRINGLVDGVSGNWYCKFDTFTPAVERGLPVTRVISRMTLQQILAQ AVGEEVIMNESNVVDFKDDGTKVTVTLDNGKSYEGDLLVGADGIWSKVRTNLFGHTDAVYSGYTCYTGIA DYVPADIESVGYRVFLGHKQYFVSSDVGAGKMQWYAFYKEDPGGADEPNGKKQRLFKMFEGWCDKVIDLI DATDEEAILRRDIYDRPPSFTWGKGRVTLLGDSIHAMQPNLGQG…	Zeaxanthin cyclooxygenase, ABA precursors and photoprotection
	Reverse Primer	GCAGGAGTGAAGGTATCG
gene-LOC110710716	Forward Primer	TCCTTCATTAACACCTTCCA	ATGGTGATCATTTTGGTGGCATTTGTTACATTAGGTGCAATTTTGATCCTCAATTATGCCCTGAAATCCC CTGTTTTCGCCTTCTCCGGTCGCCGATTTCCTAAACTATCCCTTCCTCCGGGTACCTTAGGATGGCCTTA CATAGGCGAAACTTTCCAACTCTACTCACAAAACCCAAATGTCTTCTTTGCAGACAAAGTTAAAAAGTAT GGTTCCGTTTTTAAGACACACATATTGGGATGTCCATGTGTGATGATTTCTAGCCCGGATGCAGCTAAAT TTGTTCTTTCAACTCGATCAAATTTGTTCAAACCAACATTTCCTGCTAGTAAAGAAAGGATGTTGGGTAA ACAAGCTATCTTTTTCCACCAAGGTGATTACCATGCCAAACTTA…	MVIILVAFVTLGAILILNYALKSPVFAFSGRRFPKLSLPPGTLGWPYIGETFQLYSQNPNVFFADKVKKY GSVFKTHILGCPCVMISSPDAAKFVLSTRSNLFKPTFPASKERMLGKQAIFFHQGDYHAKLRKLVLQSFM PGAIRSFVPDIDSIASQSLKSLEGSFINTFQEMKTYTFNVALLSIFGKDEVNYREDLKRCYYILEKGYNS MPINLPGTLFNKSMKARKELAQILAQIISTRREMKKDHQDLLSSFMGDKESLTDEQIADNVIGVIFAARD TTASVLTWILKYLADNSSVLQAVTEEQEAIIKEKKESGEEKVLCWADTKKMPLTIRVFQETLRVASILSF TFREAVEDVEYEGYLIPKGWKVLPLFRNIHHSPENFPEPEKFDP…	Abscisic acid 8'-hydroxylase
	Reverse Primer	ATCTTCTCTGTAGTTCACCTC
gene-LOC110725177	Forward Primer	CTCACCAACTTTGCAGGCTT	ATGTTGGAAAAAATTGAAGAATTTGACTTTGAGAAAGTGATCAAGGAGTTTGAAGAATTAAGCAAGAATG CAGGAAAAGTACAGGAGGAAACACTGAGGAAGATTCTAGAAGAAAACGCCGCGGCCGAGTATTTGCAACA AGTAGGCCTAAATGGAAGAACAGACTTTGAGAGTTTTAAGCAATGTGTTCCTATTGTACATCACAAGGAT TTAAAACCTTTTATTGAAAGAATTATGGATGGAGTTTCTTCTCCTATTCTTACTGGAAAACCTGTTTCAA CTCTTTCTTTGAGCTCTGGGACGACTCAAGGGAAGCGAAAATTTGTACCATTCAATGATCAGCTCTTTGA TAATACTATGCAAATCTATCATACTTCTTTTGCGTACCGAAACA…	MLEKIEEFDFEKVIKEFEELSKNAGKVQEETLRKILEENAAAEYLQQVGLNGRTDFESFKQCVPIVHHKD LKPFIERIMDGVSSPILTGKPVSTLSLSSGTTQGKRKFVPFNDQLFDNTMQIYHTSFAYRNREFPIKNGK ALVFLYSSRQFITEGGLPAGTATTNVFRHPKYRELMKGIQSQSCSPDEVIFGSDFHESLYCHLLCGLLNY NDVQIISSTFAHSLVQAFQTFEQVLENLCFDIRFGSLDEKVTDPITRAAMSKLLKPNPELADMIIEKCSG LSKWYGLIPELFPNAKYVYGIMTGSMEPYIKQLRRYAGWLPLVCADYGASEGWIAANVNPRSPPEEATFA VLPNIGYFEFIPLNETRNGGAEPKPVGLTEVKLGEEYEIILTNF…	Jasmonic acid-amido synthetase JAR1
	Reverse Primer	TCTCGGTGTTCTTGTCGATGT
gene-LOC110706251	Forward Primer	GCTTCGAATCAAGTGGCACA	ATGTTAACCGAAAAGCAGGGTGAGGAATCAATCGTGTCGAACTTTCACGATAATGAGAGTAACATAGACA ATAAGGAAGGTGGTGATGGCAGCAAAGAGGATGATCAGTCGATGTTTGGCCTGAAGAGTTTCCTCTGGCA CGGTGGTTCCGTTTGGGATGCCTGGTTCAGTTGTGCTTCGAATCAAGTGGCACAAGTGCTACTTACTCTT CCATACTCGTTTTCGCAATTAGGGATGCTTTCGGGAATACTACTTCAGATATTCTACGGCTTTCTGGGCA GCTGGACGGCGTATCTCATTAGTGTTCTATATGTTGAGTACCGGAGTCGGAAGGAGAAGGAAGGTGTCAA CTTCAAAAACCATGTCATTCAGTGGTTTGAAGTTCTGGATGGAT…	MLTEKQGEESIVSNFHDNESNIDNKEGGDGSKEDDQSMFGLKSFLWHGGSVWDAWFSCASNQVAQVLLTL PYSFSQLGMLSGILLQIFYGFLGSWTAYLISVLYVEYRSRKEKEGVNFKNHVIQWFEVLDGLLGPYWKAV GLAFNVIFLCFGSVIQLIACASNIYYINDHLDKRTWTYIFGACCATTVFIPSFHNYRLWSFLGLGMTTYT AWYMAIASLVHGQVEGVTHSGPSKLVLYFTGATNILYTFGGHAVTVEIMHAMWKPQKFKYIYLLATLYVF TLTLPSAAAVYWAFGDELLNHSNAFSLLPKSGFRDAAVILMLIHQFITFGFACTPLYFIWEKVIGMHDTK SLCLRALVRLPVVIPIWFLAIIFPFFGPINSAVGALLVSFTVYI…	Abscisic acid 8'-hydroxylase
	Reverse Primer	AATGAGATACGCCGTCCAGC
TUB6	Forward Primer	TGAGAACGCAGATGAGTGTATG
	Reverse Primer	GAAACGAAGACAGCAAGTGACA

## Sheet: TableS2
Table S2. Differentially accumulated metabolites between the groups
Group name	All sig diff	Down regulated	Up regulated
TR1_vs_TS1	241	40	201
CR1_vs_CS1	251	35	216
TR2_vs_TS2	159	54	105
CR2_vs_CS2	113	33	80
TR1_vs_TR2	282	141	141
TS1_vs_TS2	291	183	108
CR1_vs_CR2	253	157	96
CS1_vs_CS2	315	231	84
TR1_vs_CR1	156	123	33
TR2_vs_CR2	298	224	74
TS1_vs_CS1	210	172	38
TS2_vs_CS2	315	216	99

## Sheet: TableS3
Table S3. Top 20 upregulated and downregulated differentially accumulated metabolites between the groups
TR1-CR1								TR2-CR2
Index	Formula	Compounds	Class I	VIP	P-value	Log2FC	Type	Index	Formula	Compounds	Class I	VIP	P-value	Log2FC	Type
Lmyp001375	C13H15NO8	BOA-6-O-glucoside	Alkaloids	1.54664	0.0147765	-14.7079	down	pme0243	C5H8O4	Glutaric acid*	Organic acids	1.2979	0.0117722	-16.3815	down
Lmyn012274	C30H46O4	3,25-Epoxy-3-hydroxyolean-18-en-28-oic acid (Semimoronic acid)	Terpenoids	1.53731	0.170683	-13.5631	down	pme0295	C6H11NO3	4-Acetamidobutyric acid	Organic acids	1.29785	0.0126661	-13.9763	down
mws0823	C5H8O3	3-Methyl-2-Oxobutanoic acid	Organic acids	1.54501	0.047514	-12.9555	down	Lmfn000604	C13H16O10	6-O-Galloyl-β-D-glucose*	Phenolic acids	1.29591	0.0606247	-13.3093	down
Hmlp005624	C16H12O5	3',7-dihydroxy-4'-methoxyflavone	Flavonoids	1.54742	0.00575207	-12.555	down	MWS4471	C6H10N2O4	N-Alpha-Acetyl-L-Asparagine	Amino acids and derivatives	1.29787	0.00195486	-13.3069	down
mws0251	C5H6N2O2	Thymine	Nucleotides and derivatives	1.54649	0.0170498	-11.9337	down	Lmzn206829	C30H46O3	3-Oxoolean-12-en-28-oic Acid (Oleanonic acid)	Terpenoids	1.29383	0.0664286	-13.2665	down
mws0791	C28H34O14	Poncirin (Isosakuranetin-7-O-neohesperidoside)*	Flavonoids	1.54658	0.003903	-11.4947	down	Lmhp008885	C20H42NO7P	LysoPE 15:0(2n isomer)	Lipids	1.29695	0.0362426	-13.1826	down
MWSslk252	C28H34O14	Didymin (Isosakuranetin-7-O-rutinoside)*	Flavonoids	1.54658	0.003903	-11.4947	down	pme0137	C7H12N2O4	N-Acetyl-L-Glutamine	Amino acids and derivatives	1.29528	0.084001	-12.9744	down
MWS0631	C3H7NO5S2	S-Sulfo-L-Cysteine	Amino acids and derivatives	1.54672	0.00418067	-11.074	down	Lmhp009368	C30H50NO7P	LysoPC 22:6	Lipids	1.28664	0.186271	-12.886	down
pmf0096	C2H2O4	Oxalic acid	Organic acids	1.5467	0.00261939	-10.8846	down	Hmlp005624	C16H12O5	3',7-dihydroxy-4'-methoxyflavone	Flavonoids	1.29751	0.0161676	-12.6455	down
Lmbn003524	C9H16O3	9-Oxononanoic acid	Organic acids	1.5468	0.020299	-10.1564	down	Hmqp006656	C21H34O3	12-Hydroxyhydromethylabietate	Terpenoids	1.29498	0.0686665	-12.4908	down
HJN086	C21H22O11	Eriodictyol-3'-O-glucoside	Flavonoids	1.11088	0.194615	-10.0702	down	mws0444	C7H7NO3	3-Aminosalicylic acid	Phenolic acids	1.29789	0.00657217	-12.3271	down
mws0913	C21H20O11	Kaempferol-3-O-galactoside (Trifolin)*	Flavonoids	1.54141	0.0713208	-9.81309	down	mws0251	C5H6N2O2	Thymine	Nucleotides and derivatives	1.29604	0.0678626	-12.1133	down
mws0089	C21H20O11	Kaempferol-7-O-glucoside*	Flavonoids	1.54141	0.0713208	-9.81309	down	Cmmn012997	C20H30O2	Abietic acid	Terpenoids	1.29374	0.0616602	-11.7083	down
Lmhp010041	C27H46NO7P	LysoPE 22:5	Lipids	1.54188	0.0341465	-9.66098	down	MWS1846	C8H8O3	Phenoxyacetic acid*	Phenolic acids	1.29561	0.0305582	-11.5339	down
Cmhp003670	C17H24O10	Secologanin	Terpenoids	1.06756	0.198818	-9.32202	down	Lmhp010099	C30H52NO7P	LysoPC 22:5	Lipids	1.28996	0.165872	-11.4353	down
mws2213	C9H8O2	Cinnamic acid	Phenolic acids	1.52787	0.122454	-9.11244	down	Zmxp002867	C28H32O16	Chrysoeriol-5,7-di-O-glucoside	Flavonoids	1.29775	0.00944105	-11.3803	down
mws0930	C22H34O2	Docosapentaenoic acid	Lipids	1.54023	0.0731815	-8.47711	down	Lmhp008273	C20H40NO7P	LysoPE 15:1	Lipids	1.29503	0.0732822	-11.3795	down
Zmcn009787	C30H46O4	23-Hydroxy-3-oxoolean-12-en-28-oic acid (Hederagonic acid)	Terpenoids	1.54002	0.0750714	-8.45646	down	mws0145	C8H8O3	O-Anisic acid (2-Methoxybenzoic acid)*	Phenolic acids	1.29406	0.0530138	-10.8983	down
Lmzn206829	C30H46O3	3-Oxoolean-12-en-28-oic Acid (Oleanonic acid)	Terpenoids	1.49539	0.0468238	-4.41248	down	pmd0142	C28H58NO7P	LysoPC 20:0	Lipids	1.29633	0.0228108	-10.8434	down
MWSmce134	C30H46O3	3-Oxolup-20(29)-en-28-oic acid (Betulonic acid)*	Terpenoids	1.49405	0.157895	-4.1044	down	pmp000004	C17H14O7	4',5,7-Trihydroxy-3',6-dimethoxyflavone (Jaceosidin)	Flavonoids	1.29759	0.0131002	-10.806	down
pme2253	C6H10O6	L-Gulono-1,4-Lactone*	Others	1.47405	0.00413938	1.21808	up	MWS20166	C15H10O3	2-hydroxy-3-methyl-anthraquinone	Quinones	1.20321	0.00361017	2.25882	up
MWSmce220	C6H10O6	D-Glucono-1,5-lactone*	Others	1.47405	0.00413938	1.21808	up	Hmqp005455	C18H32O3	15(R)-Hydroxylinoleic Acid*	Lipids	1.2875	0.00690234	2.34901	up
mws1080	C12H22O11	Galactinol	Others	1.28365	0.142285	1.25728	up	pmb0130	C12H14N2O	Acetryptine	Alkaloids	1.08803	0.138466	2.71807	up
Lmsn006257	C35H30O18	Phloretin-4'-O-[4',6'-O-(S)-HHDP]-β-D-glucoside	Flavonoids	1.40812	0.0460841	1.26638	up	Zahp005843	C19H21NO5	N-Sinapoyltyramine	Alkaloids	1.29507	0.000997889	3.65865	up
pmn001669	C12H14O5	Methyl sinapate	Phenolic acids	1.0559	0.274874	1.28649	up	mws1358	C6H6O2	Pyrocatechol	Phenolic acids	1.29456	0.0573458	9.36755	up
MWS2910	C10H15N3O4	5-Methyl-2'-Deoxycytidine	Nucleotides and derivatives	1.45568	0.0536154	1.2897	up	Hmbp000568	C18H22O11	Asperuloside	Phenolic acids	1.29432	0.0479959	9.81113	up
Hmgn002833	C20H20O7	4-Ketopinoresinol	Lignans and Coumarins	1.05431	0.258566	1.34747	up	mws0047	C27H30O14	Apigenin-7-O-neohesperidoside (Rhoifolin)	Flavonoids	1.2932	0.0808513	10.0452	up
pmp000284	C11H10O5	Fraxidin (8-Hydroxy-6,7-dimethoxycoumarin)	Lignans and Coumarins	1.08177	0.229063	1.40197	up	mws0724	C10H13N5O6	8-Hydroxyguanosine	Nucleotides and derivatives	1.29657	0.0193888	10.4291	up
MWSmce539	C18H34O4	Dibutyl sebacate	Lipids	1.37868	0.0387401	1.44109	up	pme0489	C7H8N2O	N-Methylnicotinamide	Alkaloids	1.29531	0.053005	10.7842	up
mws1639	C11H10O5	Isofraxidin	Lignans and Coumarins	1.15967	0.264907	1.63119	up	Zmcp002666	C27H30O17	Quercetin-3,7-Di-O-glucoside	Flavonoids	1.29746	0.00723827	10.9752	up
Zmhn001926	C13H16O8	1-O-Salicyloyl-β-D-glucose	Phenolic acids	1.3868	0.0796733	1.65599	up	Lmsp002982	C33H40O21	Quercetin-3-O-sophoroside-7-O-rhamnoside	Flavonoids	1.29776	0.00194084	11.5296	up
Jmhn004431	C23H22O14	syringetin-3-glucuronide	Flavonoids	1.39851	0.0482355	1.74763	up	pmb2228	C27H56NO7P	LysoPC 19:0	Lipids	1.29706	0.0148808	11.5906	up
mws0889	C4H8O5	D-Threonic Acid	Others	1.49784	0.0196826	1.77961	up	pma6298	C5H5NO	3-Hydroxypyridine	Alkaloids	1.2973	0.0187055	12.0653	up
Lmtn004049	C15H20O4	Abscisic acid	Organic acids	1.47232	0.0217586	1.97492	up	Lmbn001162	C15H16O9	Esculetin-7-O-glucoside*	Lignans and Coumarins	1.29389	0.0716286	12.0811	up
Zahp005843	C19H21NO5	N-Sinapoyltyramine	Alkaloids	1.51643	0.0465877	2.95544	up	pme1137	C6H5NO3	6-Hydroxynicotinic acid	Alkaloids	1.29783	0.00073354	12.1083	up
Zmgp004786	C19H20O2	1,7-diphenyl-3,5-diheptanone	Others	1.54506	0.0245921	10.0659	up	Lmhp005872	C25H30N2O6	Diferuloylcadaverine	Alkaloids	1.29738	0.0113067	12.3025	up
pme0166	C6H6N4O2	1-Methylxanthine	Nucleotides and derivatives	1.54454	0.0201618	10.468	up	Zjlp100904	C30H46O5	3-Hydroxyolean-12-ene-28,30-dioic acid (Spergulagenic acid)	Terpenoids	1.29444	0.0872666	12.4144	up
Lmhp010162	C22H46NO7P	LysoPE 17:0	Lipids	1.5464	0.00642563	10.8985	up	Rfmb087	C18H32O4	9-Hydroxy-13-oxo-10-octadecenoic Acid	Lipids	1.29786	0.000920229	13.1533	up
pmp001259	C28H47NO8	5,8,11,14-Pentadecanoamide	Lipids	1.07213	0.193397	11.3935	up	Zbyp002402	C13H18O7	methylarbutin	Phenolic acids	1.29776	0.00371228	13.3403	up
mws0362	C17H34O2	Heptadecanoic acid	Lipids	1.54745	0.000459286	15.3129	up	Hmqp005411	C18H32O3	9-Oxo-12Z-Octadecenoic acid*	Lipids	1.29696	0.0394947	14.0112	up
TS1-CS1								TS2-CS2
Index	Formula	Compounds	Class I	VIP	P-value	Log2FC	Type	Index	Formula	Compounds	Class I	VIP	P-value	Log2FC	Type
pme1439	C9H8O3	p-Coumaric acid	Phenolic acids	1.56882	0.0110512	-19.2515	down	Lmzn006795	C30H46O3	3-Oxours-12-en-28-oic acid (Ursonic acid)*	Terpenoids	1.30344	0.0260786	-16.3543	down
Lmhp008273	C20H40NO7P	LysoPE 15:1	Lipids	1.56488	0.12069	-17.4617	down	Lmzn206829	C30H46O3	3-Oxoolean-12-en-28-oic Acid (Oleanonic acid)	Terpenoids	1.30345	0.0267565	-14.8352	down
Lmyp002919	C15H19NO9	2-Hydroxy-7-methoxy-1,4-benzoxazin-3(2H)-one glucoside (HMBOA glucoside)	Alkaloids	1.06979	0.206002	-14.5899	down	Lmyp002919	C15H19NO9	2-Hydroxy-7-methoxy-1,4-benzoxazin-3(2H)-one glucoside (HMBOA glucoside)	Alkaloids	1.3039	0.00726399	-14.7765	down
MWSslk183	C15H10O4	7,8-Dihydroxy-4-phenylcoumarin	Lignans and Coumarins	1.5166	0.241993	-14.006	down	Lmhp008273	C20H40NO7P	LysoPE 15:1	Lipids	1.27858	0.346332	-14.6485	down
MWSHY0013	C15H10O4	3,4'-Dihydroxyflavone	Flavonoids	1.52989	0.241434	-13.9889	down	MWSmce134	C30H46O3	3-Oxolup-20(29)-en-28-oic acid (Betulonic acid)*	Terpenoids	1.30276	0.057888	-14.6041	down
Lmcp005230	C17H14O4	6-Hydroxy-2-[2-(4-hydroxyphenyl)ethyl]chromone	Others	1.54478	0.261901	-13.3141	down	Lmyn012274	C30H46O4	3,25-Epoxy-3-hydroxyolean-18-en-28-oic acid (Semimoronic acid)	Terpenoids	1.30008	0.128466	-14.0954	down
Hmcp003783	C13H10N2O	1-Acetyl-β-carboline	Alkaloids	1.56252	0.0884592	-11.5983	down	Lmhp010099	C30H52NO7P	LysoPC 22:5	Lipids	1.28508	0.26467	-13.7086	down
mws0930	C22H34O2	Docosapentaenoic acid	Lipids	1.5349	0.169466	-11.528	down	pme0181	C7H11N3O2	3-Methyl-L-Histidine*	Amino acids and derivatives	1.3026	0.036911	-13.2057	down
pme0489	C7H8N2O	N-Methylnicotinamide	Alkaloids	1.56689	0.0147698	-11.3997	down	MWS0933	C7H11N3O2	1-Methylhistidine*	Amino acids and derivatives	1.3026	0.036911	-13.2057	down
pme0166	C6H6N4O2	1-Methylxanthine	Nucleotides and derivatives	1.56633	0.134436	-11.2006	down	Lmyp002284	C14H17NO8	2-Hydroxy-1,4-benzoxazine-3(2H)-one glucoside (HBOA glucoside)	Alkaloids	1.30335	0.0342018	-13.1753	down
Lmxn015337	C17H34O2	Methyl palmitate	Lipids	1.56751	0.00504172	-10.514	down	mws0444	C7H7NO3	3-Aminosalicylic acid	Phenolic acids	1.30333	0.0243829	-12.9396	down
pmp000284	C11H10O5	Fraxidin (8-Hydroxy-6,7-dimethoxycoumarin)	Lignans and Coumarins	1.5608	0.0499966	-10.0638	down	Lmhp008924	C27H50NO7P	LysoPC 19:3	Lipids	1.27244	0.341965	-12.467	down
Lmyn012274	C30H46O4	3,25-Epoxy-3-hydroxyolean-18-en-28-oic acid (Semimoronic acid)	Terpenoids	1.28442	0.150641	-7.68567	down	Lmhp010573	C27H48O9	1-Linoleoylglycerol-3-O-glucoside	Lipids	1.28494	0.269675	-12.2994	down
Lmhp010099	C30H52NO7P	LysoPC 22:5	Lipids	1.19888	0.248046	-6.5871	down	Hmlp005624	C16H12O5	3',7-dihydroxy-4'-methoxyflavone	Flavonoids	1.30363	0.0122975	-11.8739	down
Lmhp008885	C20H42NO7P	LysoPE 15:0(2n isomer)	Lipids	1.46082	0.165055	-6.30134	down	Lmhp010394	C30H54NO7P	LysoPC 22:4	Lipids	1.28679	0.21973	-11.2349	down
Lmhp010041	C27H46NO7P	LysoPE 22:5	Lipids	1.2384	0.220506	-6.00001	down	Zmdn006214	C24H24O11	Physcion-8-O-(6-acetyl)-glucoside	Quinones	1.30386	0.0100935	-11.1716	down
Lmhp008337	C19H40NO7P	LysoPE 14:0(2n isomer)	Lipids	1.47413	0.146204	-5.75227	down	mws0397	C20H30O2	Cis-5,8,11,14,17-Eicosapentaenoic Acid	Lipids	1.28142	0.280505	-11.0518	down
Lmhp009034	C21H42NO7P	LysoPE 16:1	Lipids	1.43346	0.137167	-5.07195	down	MWS2673	C20H34O4	5,6-DiHETrE[(±)5,6-dihydroxy-8Z,11Z,14Z-eicosatrienoic acid]	Lipids	1.29155	0.196737	-10.7987	down
mws1383	C12H10N4O2	Lumichrome	Alkaloids	1.26544	0.295794	-4.03402	down	Zmdn005930	C23H22O10	Chrysophanol-1-O-(6'-acetyl)-glucoside	Quinones	1.30373	0.00810967	-10.5508	down
MWS1846	C8H8O3	Phenoxyacetic acid*	Phenolic acids	1.46414	0.144753	-3.83052	down	Zmdn005800	C23H22O10	Chrysophanol-8-O-(6'-acetyl)-glucoside	Quinones	1.30373	0.00810967	-10.5508	down
pme3163	C7H15O10P	D-Sedoheptuiose 7-phosphate	Others	1.22901	0.0428108	1.29057	up	Zahp005843	C19H21NO5	N-Sinapoyltyramine	Alkaloids	1.2885	0.00674238	4.42123	up
Hmlp000935	C8H11NO2	Vanillylamine	Alkaloids	1.3363	0.0322669	1.37341	up	Lskp211488	C30H46O5	2,19-Dihydroxy-3-oxo-24-norolean-12-en-28-oic acid	Terpenoids	1.29343	0.106644	9.10435	up
Hmcp002399	C23H24O13	Limocitrin-3-O-glucoside	Flavonoids	1.5095	0.00467597	1.4116	up	MWS20166	C15H10O3	2-hydroxy-3-methyl-anthraquinone	Quinones	1.30298	0.0252004	9.65221	up
mws0574	C4H8O3	2-Hydroxyisobutyric acid*	Organic acids	1.49784	0.058691	1.55967	up	Lmsp102911	C30H46O5	3-Hydroxyurs-12-ene-27,28-dioic acid (Quinovic acid)	Terpenoids	1.29279	0.112648	9.66449	up
mws0206	C4H8O3	2-Hydroxybutyric Acid*	Organic acids	1.49784	0.058691	1.55967	up	Lmsp002982	C33H40O21	Quercetin-3-O-sophoroside-7-O-rhamnoside	Flavonoids	1.3034	0.0203182	10.5684	up
Jmhn004431	C23H22O14	syringetin-3-glucuronide	Flavonoids	1.42415	0.0983993	1.59033	up	Cmbn007148	C22H22O9	1-O-Feruloyl-3-O-caffeoylglycerol	Phenolic acids	1.3018	0.0424	10.7613	up
mws4002	C8H11NO2	Dopamine	Alkaloids	1.31059	0.0150698	1.66583	up	Wagp009552	C19H18O3	3-(1-Phenyl-2-methylprop-1-yl)-4-hydroxycoumarin	Lignans and Coumarins	1.30399	0.00562546	10.8615	up
MA10039641	C12H22O11	Lactobiose	Others	1.34212	0.00472222	1.6848	up	Zmdn003480	C26H34O12	Cycloolivil-6-O-glucoside	Lignans and Coumarins	1.304	0.0044617	11.1176	up
Hmqp005455	C18H32O3	15(R)-Hydroxylinoleic Acid*	Lipids	1.07684	0.306463	1.73325	up	pme0166	C6H6N4O2	1-Methylxanthine	Nucleotides and derivatives	1.30348	0.0207394	11.4725	up
mws0017	C7H19N3	Spermidine	Alkaloids	1.45356	0.103488	1.8204	up	mws0913	C21H20O11	Kaempferol-3-O-galactoside (Trifolin)*	Flavonoids	1.30416	0.00106826	11.8197	up
Wafn002081	C12H14O8	Dihydroxybenzoyl xyloside	Phenolic acids	1.29275	0.0233624	1.88511	up	mws0089	C21H20O11	Kaempferol-7-O-glucoside*	Flavonoids	1.30416	0.00106826	11.8197	up
MWSslk006	C10H12O4	Ethyl Vanillate	Phenolic acids	1.3331	0.045338	2.07909	up	Lmbp003668	C20H18O10	Kaempferol-3-O-arabinoside	Flavonoids	1.30165	0.0465741	12.1262	up
Zahp005843	C19H21NO5	N-Sinapoyltyramine	Alkaloids	1.49038	0.0328715	2.33979	up	Zjlp100904	C30H46O5	3-Hydroxyolean-12-ene-28,30-dioic acid (Spergulagenic acid)	Terpenoids	1.26944	0.161225	12.2249	up
pme1086	C10H17N3O6S	Glutathione reduced form	Amino acids and derivatives	1.29427	0.0233001	2.41874	up	Lmhp005872	C25H30N2O6	Diferuloylcadaverine	Alkaloids	1.30166	0.0437256	12.4102	up
mws0473	C5H8O4	2-Methylsuccinic acid*	Organic acids	1.18144	0.176738	3.12983	up	mws1610	C30H48O4	2,3-Dihydroxyurs-12-en-29-oic acid (Maslinic acid)	Terpenoids	1.29819	0.0798267	12.4292	up
Lmmn002164	C5H8O4	Monomethyl succinate*	Organic acids	1.18144	0.176738	3.12983	up	Hmln000659	C13H16O10	3-O-Galloyl-D-glucose*	Phenolic acids	1.30413	0.00232078	12.8915	up
MWS20166	C15H10O3	2-hydroxy-3-methyl-anthraquinone	Quinones	1.56718	0.010369	8.924	up	Zbyp002402	C13H18O7	methylarbutin	Phenolic acids	1.30234	0.0584116	13.2572	up
Zmdn003480	C26H34O12	Cycloolivil-6-O-glucoside	Lignans and Coumarins	1.56394	0.0591392	10.8778	up	MWSmce698	C10H12O	2',4'-Dimethylacetophenone	Others	1.30325	0.0239746	14.5794	up
mws0724	C10H13N5O6	8-Hydroxyguanosine	Nucleotides and derivatives	1.56809	0.0101224	11.1226	up	pmf0139	C6H12O6	D-Galactose*	Others	1.30396	0.0080677	15.3616	up
Lmmn002260	C27H36O12	5'-Methoxyisolariciresinol-9'-O-glucoside	Lignans and Coumarins	1.56839	0.0150205	15.4648	up	Lmyn001519	C11H10O9	L-Malic acid-2-O-gallate	Phenolic acids	1.30408	0.00391359	15.5023	up
TR1-TS1								TR2-TS2
Index	Formula	Compounds	Class I	VIP	P-value	Log2FC	Type	Index	Formula	Compounds	Class I	VIP	P-value	Log2FC	Type
Lmhn002629	C11H10O7	Benzoyltartaric acid	Phenolic acids	1.44748	0.0160516	-17.4161	down	Lmhn002140	C14H14O9	Feruloyltartaric acid (Fertaric acid)	Phenolic acids	1.48445	0.00532752	-16.4358	down
Lmhn002140	C14H14O9	Feruloyltartaric acid (Fertaric acid)	Phenolic acids	1.44796	0.0301761	-15.9657	down	pmn001687	C13H12O8	Coutaric acid	Phenolic acids	1.48451	0.00274994	-15.5189	down
Lmmn002260	C27H36O12	5'-Methoxyisolariciresinol-9'-O-glucoside	Lignans and Coumarins	1.44701	0.023069	-15.3237	down	Lmyn001519	C11H10O9	L-Malic acid-2-O-gallate	Phenolic acids	1.47635	0.117398	-14.705	down
pmn001687	C13H12O8	Coutaric acid	Phenolic acids	1.44839	0.0645275	-14.4189	down	pmf0139	C6H12O6	D-Galactose*	Others	1.05283	0.214357	-14.2628	down
MWSmce342	C13H12O9	2-Caffeoyl-L-tartaric acid (Caftaric acid)	Phenolic acids	1.4472	0.00747463	-13.6963	down	MWSmce342	C13H12O9	2-Caffeoyl-L-tartaric acid (Caftaric acid)	Phenolic acids	1.4845	0.00178666	-13.5452	down
Lmyn001519	C11H10O9	L-Malic acid-2-O-gallate	Phenolic acids	1.06492	0.28569	-12.4987	down	Lmzn106284	C30H48O4	2,3-Dihydroxylup-20(29)-en-28-oic acid (Alphitolic acid)	Terpenoids	1.04748	0.300058	-13.1841	down
Lmhp003013	C15H22N2O3	N-Feruloyl-Cadaverine	Alkaloids	1.44752	0.0105668	-12.142	down	Hmln000659	C13H16O10	3-O-Galloyl-D-glucose*	Phenolic acids	1.4839	0.0152544	-12.0094	down
Zmdn003480	C26H34O12	Cycloolivil-6-O-glucoside	Lignans and Coumarins	1.44204	0.0171686	-10.8501	down	Lmbp003668	C20H18O10	Kaempferol-3-O-arabinoside	Flavonoids	1.4836	0.0244032	-11.8969	down
mws0724	C10H13N5O6	8-Hydroxyguanosine	Nucleotides and derivatives	1.43395	0.0549474	-9.79339	down	Cmmn012997	C20H30O2	Abietic acid	Terpenoids	1.47884	0.0616602	-11.7083	down
MWS20166	C15H10O3	2-hydroxy-3-methyl-anthraquinone	Quinones	1.43876	0.0269067	-7.92967	down	pme0166	C6H6N4O2	1-Methylxanthine	Nucleotides and derivatives	1.48292	0.0300079	-11.2347	down
mws0473	C5H8O4	2-Methylsuccinic acid*	Organic acids	1.44607	2.62491e-08	-3.0606	down	Lmhp003013	C15H22N2O3	N-Feruloyl-Cadaverine	Alkaloids	1.48374	0.0180989	-10.9365	down
Lmmn002164	C5H8O4	Monomethyl succinate*	Organic acids	1.44607	2.62491e-08	-3.0606	down	mws0913	C21H20O11	Kaempferol-3-O-galactoside (Trifolin)*	Flavonoids	1.48207	0.0436143	-10.4508	down
pme1086	C10H17N3O6S	Glutathione reduced form	Amino acids and derivatives	1.22935	0.00229536	-2.60378	down	mws0089	C21H20O11	Kaempferol-7-O-glucoside*	Flavonoids	1.48207	0.0436143	-10.4508	down
MWSslk006	C10H12O4	Ethyl Vanillate	Phenolic acids	1.23443	0.0107898	-1.87463	down	Zmdn003480	C26H34O12	Cycloolivil-6-O-glucoside	Lignans and Coumarins	1.48365	0.0111172	-10.3482	down
pmp000971	C16H12O6	6-Demethoxy-7-methylcapillarisin	Others	1.37055	0.00910047	-1.8378	down	HJN086	C21H22O11	Eriodictyol-3'-O-glucoside	Flavonoids	1.05235	0.210889	-9.07541	down
Lmqp003647	C21H18O13	Herbacetin-3-O-glucuronide	Flavonoids	1.16271	0.0294485	-1.5324	down	MWS20166	C15H10O3	2-hydroxy-3-methyl-anthraquinone	Quinones	1.47336	0.0658694	-7.56479	down
pme3350	C10H13N5O5	8-Hydroxy-2-deoxyguanosine	Nucleotides and derivatives	1.30701	0.0707733	-1.38611	down	Lmhn002629	C11H10O7	Benzoyltartaric acid	Phenolic acids	1.1728	2.91144e-05	-6.51211	down
MWS00216g	C9H13NO	L-Phenylalaninol	Amino acids and derivatives	1.35592	0.00425423	-1.37625	down	mws1622	C15H22O	α-Cyperone	Terpenoids	1.37888	0.15373	-3.1298	down
Lmxp001668	C9H10O2	2-Methoxy-4-ethenylphenol	Phenolic acids	1.32905	0.0267956	-1.33759	down	MWSHY0092	C27H32O15	Eriodictyol-7-O-Rutinoside (Eriocitrin)	Flavonoids	1.46833	0.0022309	-2.49239	down
Hmpp103270	C21H20O12	Eriodictyol-7-O-glucoronide	Flavonoids	1.37868	0.0133265	-1.31768	down	MWSHY0050	C27H30O15	Kaempferol-3-O-rutinoside(Nicotiflorin)*	Flavonoids	1.46229	0.00264232	-2.44003	down
Lmsp003881	C33H40O19	Kaempferol-3-O-rutinoside-7-O-rhamnoside	Flavonoids	1.36241	0.121859	3.18199	up	Lmhp007840	C27H52NO7P	LysoPC 19:2	Lipids	1.13841	0.343702	3.52857	up
mws0103	C9H7NO	Indole-3-carboxaldehyde	Alkaloids	1.22055	0.152801	3.18383	up	mws0879	C20H32O3	12S-Hydroxy-5Z,8Z,10E,14Z-eicosatetraenoic acid	Lipids	1.04766	0.192165	7.55234	up
MWS2430	C15H30O2	13-methylmyristic acid	Lipids	1.27581	0.188346	3.51392	up	mws0047	C27H30O14	Apigenin-7-O-neohesperidoside (Rhoifolin)	Flavonoids	1.04625	0.210964	8.152	up
pme1841	C5H14N2	Cadaverine	Alkaloids	1.20632	0.243443	3.60062	up	Hmcp003783	C13H10N2O	1-Acetyl-β-carboline	Alkaloids	1.47715	0.101034	9.07793	up
Lmcp005230	C17H14O4	6-Hydroxy-2-[2-(4-hydroxyphenyl)ethyl]chromone	Others	1.14938	0.28969	3.68297	up	mws0724	C10H13N5O6	8-Hydroxyguanosine	Nucleotides and derivatives	1.48276	0.0208085	9.30844	up
MWS2070	C10H12O3	Propyl 4-hydroxybenzoate	Phenolic acids	1.15568	0.159805	3.78857	up	mws1358	C6H6O2	Pyrocatechol	Phenolic acids	1.48042	0.0399511	9.37092	up
Lmyn012274	C30H46O4	3,25-Epoxy-3-hydroxyolean-18-en-28-oic acid (Semimoronic acid)	Terpenoids	1.14879	0.166416	3.84931	up	MWSslk183	C15H10O4	7,8-Dihydroxy-4-phenylcoumarin	Lignans and Coumarins	1.46671	0.139857	9.86414	up
Lmhp009368	C30H50NO7P	LysoPC 22:6	Lipids	1.27023	0.259682	4.00504	up	Zmcp002666	C27H30O17	Quercetin-3,7-Di-O-glucoside	Flavonoids	1.4835	0.0183338	10.1803	up
Lmhp009034	C21H42NO7P	LysoPE 16:1	Lipids	1.29643	0.142484	4.26113	up	MWSHY0013	C15H10O4	3,4'-Dihydroxyflavone	Flavonoids	1.47397	0.146824	10.4229	up
Lmhp008273	C20H40NO7P	LysoPE 15:1	Lipids	1.30563	0.131273	4.26246	up	Lmbn001162	C15H16O9	Esculetin-7-O-glucoside*	Lignans and Coumarins	1.48439	0.00716428	10.7089	up
Lmhp010099	C30H52NO7P	LysoPC 22:5	Lipids	1.05721	0.262037	4.27874	up	MWS2673	C20H34O4	5,6-DiHETrE[(±)5,6-dihydroxy-8Z,11Z,14Z-eicosatrienoic acid]	Lipids	1.47098	0.196737	10.7987	up
Lmhp008885	C20H42NO7P	LysoPE 15:0(2n isomer)	Lipids	1.26419	0.17145	4.7385	up	pme0489	C7H8N2O	N-Methylnicotinamide	Alkaloids	1.48218	0.0336155	10.913	up
Lmhp008337	C19H40NO7P	LysoPE 14:0(2n isomer)	Lipids	1.3132	0.150631	4.73891	up	pma6298	C5H5NO	3-Hydroxypyridine	Alkaloids	1.4839	0.013359	11.6601	up
Lhyn080508	C13H18O3	Dehydrovomifoliol	Terpenoids	1.42366	0.0601522	5.07935	up	Lmbn002644	C8H8O	4-Methylbenzaldehyde*	Others	1.48366	0.0264868	11.9626	up
Zmgp004786	C19H20O2	1,7-diphenyl-3,5-diheptanone	Others	1.4449	0.0239509	9.82829	up	pme1137	C6H5NO3	6-Hydroxynicotinic acid	Alkaloids	1.48464	0.00238435	12.3176	up
pme0166	C6H6N4O2	1-Methylxanthine	Nucleotides and derivatives	1.44159	0.134436	11.2006	up	Hmqp005411	C18H32O3	9-Oxo-12Z-Octadecenoic acid*	Lipids	1.4846	0.00356161	12.4626	up
Wagp009552	C19H18O3	3-(1-Phenyl-2-methylprop-1-yl)-4-hydroxycoumarin	Lignans and Coumarins	1.44286	0.057964	11.6452	up	Lmyn012274	C30H46O4	3,25-Epoxy-3-hydroxyolean-18-en-28-oic acid (Semimoronic acid)	Terpenoids	1.48041	0.128466	14.0954	up
Lmhp010162	C22H46NO7P	LysoPE 17:0	Lipids	1.44332	0.05866	12.4401	up	Rfmb087	C18H32O4	9-Hydroxy-13-oxo-10-octadecenoic Acid	Lipids	1.48447	0.00919662	14.3506	up
pmp001259	C28H47NO8	5,8,11,14-Pentadecanoamide	Lipids	1.44439	0.0195721	12.5422	up	MWSHY0190	C28H32O15	Diosmetin-7-O-rutinoside (Diosmin)*	Flavonoids	1.48469	3.00904e-05	14.4294	up
mws0362	C17H34O2	Heptadecanoic acid	Lipids	1.44592	0.00956137	14.3998	up	pmb2228	C27H56NO7P	LysoPC 19:0	Lipids	1.45909	0.34125	14.4871	up
TR1-TR2								TS1-TS2
Index	Formula	Compounds	Class I	VIP	P-value	Log2FC	Type	Index	Formula	Compounds	Class I	VIP	P-value	Log2FC	Type
pme1439	C9H8O3	p-Coumaric acid	Phenolic acids	1.31372	0.00157073	-18.9204	down	pme1439	C9H8O3	p-Coumaric acid	Phenolic acids	1.37145	0.0110512	-19.2515	down
mws1610	C30H48O4	2,3-Dihydroxyurs-12-en-29-oic acid (Maslinic acid)	Terpenoids	1.30665	0.160703	-15.375	down	mws1610	C30H48O4	2,3-Dihydroxyurs-12-en-29-oic acid (Maslinic acid)	Terpenoids	1.35948	0.226876	-15.2589	down
MWSmce698	C10H12O	2',4'-Dimethylacetophenone	Others	1.31368	0.00231519	-15.2656	down	Lmzn106284	C30H48O4	2,3-Dihydroxylup-20(29)-en-28-oic acid (Alphitolic acid)	Terpenoids	1.34524	0.343776	-15.1618	down
MWSHY0190	C28H32O15	Diosmetin-7-O-rutinoside (Diosmin)*	Flavonoids	1.31358	0.0024761	-14.3564	down	pmf0139	C6H12O6	D-Galactose*	Others	1.37142	0.0092609	-15.0707	down
Zbyp002402	C13H18O7	methylarbutin	Phenolic acids	1.31365	0.0090145	-13.9223	down	MWSmce698	C10H12O	2',4'-Dimethylacetophenone	Others	1.37092	0.0250027	-14.979	down
Zjlp100904	C30H46O5	3-Hydroxyolean-12-ene-28,30-dioic acid (Spergulagenic acid)	Terpenoids	1.31229	0.0278606	-13.8128	down	Hmjn008136	C30H46O4	2,3-Dihydroxyoleana-11,13(18)-dien-28-oic acid (Camaldulenic acid)	Terpenoids	1.36965	0.03586	-14.2046	down
pmb2228	C27H56NO7P	LysoPC 19:0	Lipids	1.3099	0.116534	-13.6352	down	Zjlp100904	C30H46O5	3-Hydroxyolean-12-ene-28,30-dioic acid (Spergulagenic acid)	Terpenoids	1.37142	0.00138589	-13.9975	down
Lmyn012274	C30H46O4	3,25-Epoxy-3-hydroxyolean-18-en-28-oic acid (Semimoronic acid)	Terpenoids	1.30668	0.170683	-13.5631	down	Zbyp002402	C13H18O7	methylarbutin	Phenolic acids	1.3714	0.0059577	-13.498	down
Rfmb087	C18H32O4	9-Hydroxy-13-oxo-10-octadecenoic Acid	Lipids	1.30952	0.0661518	-13.3978	down	Lmzn006169	C30H48O4	3,19-Dihydroxyurs-12-en-28-oic acid (Pomolic acid)	Terpenoids	1.36813	0.0614787	-13.4973	down
pma6298	C5H5NO	3-Hydroxypyridine	Alkaloids	1.31368	0.00336339	-13.2969	down	Hmbn005207	C30H48O4	3,23-Dihydroxyolean-12-en-28-oic acid (Hederagenin)	Terpenoids	1.36813	0.0614787	-13.4973	down
MWSHY0013	C15H10O4	3,4'-Dihydroxyflavone	Flavonoids	1.28542	0.330984	-13.0487	down	Lmhn002051	C12H12O8	Vnilloylmalic acid	Phenolic acids	1.37077	0.0267521	-13.1837	down
Lmbn001162	C15H16O9	Esculetin-7-O-glucoside*	Lignans and Coumarins	1.3136	0.00163539	-13.0316	down	MWS00275g	C9H11NO3	DL-O-tyrosine	Amino acids and derivatives	1.36886	0.0607253	-12.9249	down
MWSslk183	C15H10O4	7,8-Dihydroxy-4-phenylcoumarin	Lignans and Coumarins	1.28819	0.320925	-12.9027	down	Lmsp102911	C30H46O5	3-Hydroxyurs-12-ene-27,28-dioic acid (Quinovic acid)	Terpenoids	1.37082	0.0109828	-12.4537	down
Hmqp005411	C18H32O3	9-Oxo-12Z-Octadecenoic acid*	Lipids	1.31377	0.00380769	-12.6553	down	Lmhp005872	C25H30N2O6	Diferuloylcadaverine	Alkaloids	1.37092	0.00818698	-12.3662	down
Lmhp005872	C25H30N2O6	Diferuloylcadaverine	Alkaloids	1.31252	0.0247966	-12.6103	down	Cmmn012997	C20H30O2	Abietic acid	Terpenoids	1.371	0.013439	-12.3386	down
Lmhn002051	C12H12O8	Vnilloylmalic acid	Phenolic acids	1.31353	0.0068012	-12.6002	down	Hmln000659	C13H16O10	3-O-Galloyl-D-glucose*	Phenolic acids	1.36507	0.096545	-11.847	down
pme1137	C6H5NO3	6-Hydroxynicotinic acid	Alkaloids	1.31371	0.00161232	-12.5764	down	Lskp211488	C30H46O5	2,19-Dihydroxy-3-oxo-24-norolean-12-en-28-oic acid	Terpenoids	1.37076	0.0222143	-11.6922	down
Lmsp002982	C33H40O21	Quercetin-3-O-sophoroside-7-O-rhamnoside	Flavonoids	1.31353	0.00711372	-11.9363	down	Cmbn007148	C22H22O9	1-O-Feruloyl-3-O-caffeoylglycerol	Phenolic acids	1.37138	0.0073814	-11.6686	down
Zmcp002666	C27H30O17	Quercetin-3,7-Di-O-glucoside	Flavonoids	1.31336	0.0064642	-11.9114	down	Wagp009552	C19H18O3	3-(1-Phenyl-2-methylprop-1-yl)-4-hydroxycoumarin	Lignans and Coumarins	1.36716	0.057964	-11.6452	down
MWS00275g	C9H11NO3	DL-O-tyrosine	Amino acids and derivatives	1.31244	0.0195692	-11.7283	down	Zmcn009787	C30H46O4	23-Hydroxy-3-oxoolean-12-en-28-oic acid (Hederagonic acid)	Terpenoids	1.36754	0.0522128	-11.5244	down
MWSmce539	C18H34O4	Dibutyl sebacate	Lipids	1.22767	0.0948292	2.73375	up	pmf0138	C6H12O6	D-Mannose*	Others	1.34972	0.00355593	2.13609	up
Zmyn005252	C17H34O3	3-Hydroxy-palmitic acid methyl ester	Lipids	1.2862	0.0153528	2.78825	up	mws1002	C17H14O8	Syringetin	Flavonoids	1.2623	0.0255971	2.19891	up
pmn001669	C12H14O5	Methyl sinapate	Phenolic acids	1.28449	0.0039124	2.85237	up	pmb0501	C5H14N4	Agmatine	Alkaloids	1.32313	0.00379103	2.22338	up
pmf0096	C2H2O4	Oxalic acid	Organic acids	1.29958	0.0304087	2.93506	up	Zmyn005252	C17H34O3	3-Hydroxy-palmitic acid methyl ester	Lipids	1.33859	0.0195902	2.24516	up
MWS2070	C10H12O3	Propyl 4-hydroxybenzoate	Phenolic acids	1.12174	0.0759631	2.98381	up	pme3311	C6H14O12P2	D-Fructose-1,6-biphosphate	Others	1.37127	2.20811e-06	2.2642	up
MWSmce668	C10H16N5O13P3	ATP; Adenosine 5'-Triphosphate	Nucleotides and derivatives	1.257	0.0636027	3.08811	up	Zmgn000447	C3H7O7P	3-Phospho-D-glyceric acid	Others	1.35407	0.000780505	2.26495	up
pmf0138	C6H12O6	D-Mannose*	Others	1.30849	0.0033072	3.42578	up	Lmlp003161	C14H20N2O3	N-Feruloylputrescine	Alkaloids	1.36916	0.00253019	2.29131	up
mws4170	C6H12O6	D-Glucose*	Others	1.31108	0.00506933	3.44122	up	Jmhn004431	C23H22O14	syringetin-3-glucuronide	Flavonoids	1.36497	7.86484e-05	2.29309	up
MWS2430	C15H30O2	13-methylmyristic acid	Lipids	1.28818	0.0473016	3.4769	up	mws1167	C4H4O5	Oxalacetic acid	Organic acids	1.35002	0.0181832	2.36435	up
MWS3166	C18H35NO3	N-Palmitoylglycine	Amino acids and derivatives	1.30061	0.0186686	3.51524	up	pme2117	C10H15N5O10P2	Adenosine 5'-diphosphate	Nucleotides and derivatives	1.36403	0.000393118	2.44505	up
MWSmce083	C11H12O4	Ferulic acid methyl ester	Phenolic acids	1.30663	0.0102332	3.7379	up	MWS3166	C18H35NO3	N-Palmitoylglycine	Amino acids and derivatives	1.35598	0.00531794	2.58582	up
Lmcn009122	C16H30O2	(7Z)-Hexadecenoic acid*	Lipids	1.2979	0.0322325	3.75101	up	MA10039492	C6H6O6	Dehydroascorbic acid	Others	1.33818	7.11657e-05	2.60876	up
pmb2620	C11H12O4	3,4-Dimethoxycinnamic acid	Phenolic acids	1.30897	0.013926	3.80683	up	Zmyn000083	C6H14O12P2	D-Glucose 1,6-bisphosphate	Others	1.33256	0.000360931	2.68523	up
Zbdn007423	C11H12O4	6,7-Dimethoxy-4-chromanone	Flavonoids	1.30777	0.0139462	3.81134	up	Zmzn000078	C3H7O6P	Dihydroxyacetone phosphate	Others	1.35211	3.24479e-05	2.72137	up
mws0361	C16H30O2	Palmitoleic Acid*	Lipids	1.29761	0.0362093	3.81259	up	pme1086	C10H17N3O6S	Glutathione reduced form	Amino acids and derivatives	1.21809	0.000456156	3.26292	up
pmb2643	C14H26O2	Myristoleic acid	Lipids	1.27055	0.0336622	4.02827	up	mws0473	C5H8O4	2-Methylsuccinic acid*	Organic acids	1.37058	0.00090018	3.76761	up
Zmgp004786	C19H20O2	1,7-diphenyl-3,5-diheptanone	Others	1.31305	0.00775932	9.62495	up	Lmmn002164	C5H8O4	Monomethyl succinate*	Organic acids	1.37058	0.00090018	3.76761	up
pme0166	C6H6N4O2	1-Methylxanthine	Nucleotides and derivatives	1.31183	0.0300079	11.2347	up	MWSmce668	C10H16N5O13P3	ATP; Adenosine 5'-Triphosphate	Nucleotides and derivatives	1.33001	0.000628187	3.94912	up
Lmhp010162	C22H46NO7P	LysoPE 17:0	Lipids	1.31353	0.0113261	11.6853	up	mws0724	C10H13N5O6	8-Hydroxyguanosine	Nucleotides and derivatives	1.36915	0.0208085	9.30844	up
mws0362	C17H34O2	Heptadecanoic acid	Lipids	1.3113	0.0745397	16.4207	up	Lmmn002260	C27H36O12	5'-Methoxyisolariciresinol-9'-O-glucoside	Lignans and Coumarins	1.36599	0.120487	14.5936	up

## Sheet: TableS4
Table S4. Significantly different metabolic pathways between the groups
Groups	Kegg_pathway	Ko_ID	P-value
TR1 VS CR1	Caffeine metabolism	ko00232	0.00881548
	Arginine biosynthesis	ko00220	0.0233964
TR2 VS CR2	Arginine and proline metabolism	ko00330	0.00447124
	Flavone and flavonol biosynthesis	ko00944	0.00664078
	Lysine degradation	ko00310	0.0171696
	D-Amino acid metabolism	ko00470	0.0184124
	Lysine biosynthesis	ko00300	0.0309442
	Biosynthesis of amino acids	ko01230	0.0333711
	Arginine biosynthesis	ko00220	0.0389037
	Plant hormone signal transduction	ko04075	0.0439513
TS1 VS CS1	Biosynthesis of unsaturated fatty acids	ko01040	0.00149918
	Diterpenoid biosynthesis	ko00904	0.019255
	Isoquinoline alkaloid biosynthesis	ko00950	0.0380543
	Phenylalanine metabolism	ko00360	0.0440741
TS2 VS CS2	Flavone and flavonol biosynthesis	ko00944	0.0223747
	Biosynthesis of amino acids	ko01230	0.0456845
	Lysine degradation	ko00310	0.0477076
TR1 VS TS1	Phenylalanine metabolism	ko00360	0.00014328
	Biosynthesis of various alkaloids	ko00996	0.0244822
	Caffeine metabolism	ko00232	0.0321915
	Ubiquinone and other terpenoid-quinone biosynthesis	ko00130	0.0321915
TR2 VS TS2	Flavone and flavonol biosynthesis	ko00944	0.0308808
TR1 VS TR2	Glycolysis / Gluconeogenesis	ko00010	0.001152
	Galactose metabolism	ko00052	0.0109418
	Glycerophospholipid metabolism	ko00564	0.0275268
TS1 VS TS2	Starch and sucrose metabolism	ko00500	0.00121256
	Galactose metabolism	ko00052	0.00145902
	Nucleotide metabolism	ko01232	0.00189848
	Carbon fixation in photosynthetic organisms	ko00710	0.00400543
	Glycerolipid metabolism	ko00561	0.00808283
	Glycolysis / Gluconeogenesis	ko00010	0.0110276
	Purine metabolism	ko00230	0.0154302
	Photosynthesis	ko00195	0.0272305
	Phenylalanine, tyrosine and tryptophan biosynthesis	ko00400	0.0470058
	Phenylalanine metabolism	ko00360	0.048886
	Metabolic pathways	ko01100	0.0489281

## Sheet: TableS5
Table S5. Summary of sequencing data quality
Sample	Raw read	Clean read	Clean base (Gb)	Total mapped (%)	Q20 (%)	Q30 (%)	GC content (%)
TR1-1	43972166	42608308	6.39	44262701(94.43%)	97.93	93.85	43.31
TR1-2	43944992	42578464	6.39	43461904(94.63%)	97.44	92.73	42.99
TR1-3	45595658	44425072	6.66	48500549(94.72%)	97.72	93.43	43.11
CR1-1	48162956	46874816	7.03	40304839(95.85%)	97.59	93.12	41.99
CR1-2	47859194	45928972	6.89	41630120(95.87%)	97.7	93.4	43.1
CR1-3	54060192	51205688	7.68	46867436(95.60%)	97.77	93.53	43.51
TS1-1	46037472	44552868	6.68	39956455(93.59%)	97.83	93.63	43.4
TS1-2	41783590	41036104	6.16	40432113(92.15%)	97.93	93.65	43.29
TS1-3	48676360	46913220	7.04	41454152(94.21%)	97.68	93.35	43.34
CS1-1	44376014	42694192	6.4	39533448(95.25%)	97.85	93.68	43.46
CS1-2	45252988	43874942	6.58	41633615(95.55%)	97.44	92.76	43.51
CS1-3	45482094	44003376	6.6	42359571(95.29%)	97.55	93.02	43.35
TR2-1	45395826	43951306	6.59	38472023(90.29%)	97.78	93.62	43.19
TR2-2	45129038	43966684	6.6	37725450(88.60%)	97.7	93.38	42.89
TR2-3	46948314	45407174	6.81	41577709(93.59%)	97.76	93.52	42.92
CR2-1	43663248	42051570	6.31	41397911(94.19%)	98.04	94.1	43.56
CR2-2	45146632	43424762	6.51	41182772(93.67%)	97.52	92.98	43.24
CR2-3	53280224	49023542	7.35	42181629(92.90%)	97.82	93.58	43.45
TS2-1	45694894	43740484	6.56	41657068(93.50%)	97.59	93.14	43.16
TS2-2	45228854	43381246	6.51	37088184(90.38%)	97.78	93.59	43.26
TS2-3	49374408	47948988	7.19	42571421(90.75%)	97.92	93.91	43.34
CS2-1	43805808	41506700	6.23	41336222(94.50%)	97.93	93.89	43.62
CS2-2	45850194	43571766	6.54	40991738(94.49%)	97.98	93.98	43.49
CS2-3	45529526	44454952	6.67	44658299(93.14%)	97.9	93.8	43.58
					97.7562	93.485

## Sheet: TableS6
Table S6.The results of gene annotation
Item	The number of gene
KEGG	42891
GO	41125
NR	59086
Swiss-Prot	37101
Tremble	57905
KOG	52602
Pfam	47860

## Sheet: TableS7
Table S7. Results of KEGG pathway
Pathway	Pathway_id	Gene_id	KEGG_ORTHOLOGY
Glycolysis / Gluconeogenesis	ko00010	LOC110733184;LOC110735383;LOC110717704;LOC110689345;LOC110725809;LOC110738731;LOC110717695;LOC110698203;LOC110698202;LOC110733825;LOC110733826;LOC110730407;LOC110719370;LOC110698365;LOC110702595;novel.402;novel.403;LOC110732766;LOC110704635;novel.603;LOC110708308;LOC110700134;LOC110709669;LOC110721625;LOC110721627;LOC110689684;LOC110699087;LOC110728039;LOC110699058;LOC110699057;novel.1883;LOC1107…	K00001+K00002+K00016+K00121+K00128+K00131+K00134+K00161+K00162+K00382+K00627+K00844+K00850+K00873+K00895+K00927+K01006+K01568+K01610+K01623+K01689+K01785+K01792+K01803+K01810+K01834+K01835+K01895+K01913+K03103+K03841+K14085+K15633+K15634+K18857
Citrate cycle (TCA cycle)	ko00020	LOC110703738;LOC110707421;LOC110714132;LOC110721337;LOC110689431;LOC110718311;LOC110686902;LOC110686158;LOC110722334;LOC110689818;LOC110685538;LOC110728589;LOC110712575;LOC110726448;LOC110700602;LOC110737759;LOC110707141;LOC110724961;LOC110721213;LOC110721189;LOC110687528;LOC110727239;LOC110690841;LOC110740099;LOC110740096;LOC110738453;LOC110722505;LOC110720542;LOC110697688;LOC110734160;novel.250…	K00025+K00026+K00030+K00031+K00161+K00162+K00164+K00234+K00235+K00236+K00382+K00627+K00658+K01610+K01647+K01648+K01679+K01681+K01899+K01900
Pentose phosphate pathway	ko00030	LOC110686033;LOC110719631;LOC110720997;LOC110722639;LOC110701214;LOC110736542;LOC110694143;LOC110711355;LOC110690517;LOC110707471;LOC110700522;LOC110735027;LOC110723091;novel.7145;novel.968;novel.3541;LOC110733662;LOC110705912;LOC110714594;LOC110721444;LOC110738065;LOC110697188;LOC110704612;LOC110706720;LOC110690455;LOC110711936;LOC110732741;LOC110706655;LOC110692319;LOC110730405;LOC110723769;LOC…	K00033+K00036+K00131+K00615+K00616+K00850+K00851+K00852+K00895+K00948+K01057+K01623+K01783+K01807+K01810+K01835+K03841
Pentose and glucuronate interconversions	ko00040	LOC110735383;LOC110717704;LOC110689345;LOC110725809;LOC110738731;LOC110717695;LOC110698203;LOC110698202;LOC110733825;LOC110733826;LOC110730407;LOC110719370;LOC110698365;LOC110702595;novel.402;novel.403;LOC110703834;LOC110703830;LOC110697125;LOC110710556;LOC110729727;LOC110739658;LOC110739659;LOC110712843;LOC110726369;LOC110700674;LOC110724483;LOC110724482;LOC110712121;LOC110711971;LOC110686899;LO…	K00002+K00008+K00012+K00078+K00854+K00875+K00963+K01051+K01184+K01213+K01728+K01783+K01805+K12447+K16190+K22935
Fructose and mannose metabolism	ko00051	LOC110703834;LOC110703830;LOC110697125;LOC110710556;LOC110729727;LOC110739658;LOC110739659;LOC110712843;LOC110690932;LOC110688727;LOC110715552;LOC110729879;LOC110729878;LOC110717167;LOC110707684;LOC110715383;LOC110736264;LOC110686362;LOC110729881;novel.6953;novel.10107;novel.11697;novel.4692;LOC110718133;LOC110720372;LOC110734395;LOC110694761;LOC110702931;LOC110728928;LOC110703440;LOC110732060;LO…	K00008+K00844+K00847+K00850+K00863+K00895+K00966+K01103+K01623+K01711+K01803+K01805+K01809+K01840+K02377+K03841+K05305+K17497+K18447+K19355
Galactose metabolism	ko00052	LOC110690932;LOC110688727;LOC110715552;LOC110729879;LOC110729878;LOC110717167;LOC110707684;LOC110715383;LOC110736264;LOC110686362;LOC110729881;novel.6953;novel.10107;novel.11697;novel.4692;LOC110706655;LOC110692319;LOC110730405;LOC110723769;LOC110719108;LOC110702469;LOC110692240;LOC110713332;LOC110729238;LOC110683635;LOC110733270;LOC110690897;LOC110736626;LOC110719827;LOC110715485;LOC110719272;LO…	K00844+K00850+K00963+K00965+K01187+K01190+K01193+K01784+K01785+K01835+K06611+K06617+K07407+K12309+K12447+K18819
Ascorbate and aldarate metabolism	ko00053	LOC110735383;LOC110717704;LOC110689345;LOC110725809;LOC110738731;LOC110717695;LOC110698203;LOC110698202;LOC110733825;LOC110733826;LOC110730407;LOC110719370;LOC110698365;LOC110702595;novel.402;novel.403;LOC110726369;LOC110700674;LOC110724483;LOC110724482;LOC110712121;LOC110711971;LOC110686899;LOC110686138;LOC110724593;LOC110711965;LOC110722102;LOC110737278;LOC110735086;LOC110711994;LOC110717323;no…	K00002+K00012+K00103+K00128+K00225+K00423+K00434+K00469+K08232+K08679+K10046+K10047+K12447+K14085+K14190+K16190+K17744+K18649+K21888
Fatty acid biosynthesis	ko00061	LOC110736931;LOC110736056;LOC110710448;LOC110708609;LOC110716052;LOC110710455;LOC110716101;LOC110725927;LOC110725925;LOC110716066;LOC110711529;LOC110712407;LOC110712365;LOC110707335;LOC110684731;LOC110708610;LOC110707436;LOC110707540;LOC110707542;LOC110707435;LOC110724230;LOC110702855;novel.5805;novel.7097;novel.10699;LOC110686509;LOC110739780;LOC110724264;LOC110688516;LOC110684163;LOC110704616;L…	K00059+K00208+K00645+K00648+K01897+K01961+K01962+K01963+K02160+K02372+K03921+K07512+K09458+K10781+K10782+K11262+K18660
Fatty acid elongation	ko00062	LOC110731525;LOC110714088;LOC110730341;LOC110732380;LOC110684193;LOC110684675;LOC110702533;LOC110699690;LOC110696829;LOC110713741;LOC110704158;LOC110683200;LOC110712414;LOC110713644;LOC110727435;LOC110730773;LOC110691455;LOC110715675;LOC110735622;LOC110713704;LOC110712567;LOC110739333;LOC110710104;LOC110685125;LOC110703029;LOC110703728;LOC110727213;LOC110725967;LOC110712528;novel.8856;novel.1152;…	K01068+K01074+K07512+K10246+K10251+K10258+K10703+K15397
Fatty acid degradation	ko00071	LOC110733184;LOC110708308;LOC110700134;LOC110709669;LOC110721625;LOC110721627;LOC110689684;LOC110699087;LOC110728039;LOC110699058;LOC110699057;novel.1883;LOC110700413;LOC110701311;LOC110694133;LOC110694135;LOC110694134;LOC110736845;LOC110738449;LOC110709762;LOC110693069;LOC110708205;LOC110698476;LOC110727043;LOC110685890;LOC110736643;LOC110738545;LOC110700723;LOC110696022;LOC110696021;LOC11073449…	K00001+K00121+K00128+K00232+K00249+K00626+K01692+K01897+K07513+K07517+K10527+K14085+K15401+K18857+K20495
Synthesis and degradation of ketone bodies	ko00072	LOC110730839;LOC110739610;LOC110691704;LOC110712141;LOC110707017;LOC110692054;LOC110735521;novel.11015;LOC110700995;LOC110700990;LOC110711671;LOC110698356;LOC110710537;LOC110736319;LOC110736314;LOC110719437;LOC110702521	K00626+K01640+K01641
Cutin, suberine and wax biosynthesis	ko00073	LOC110716628;LOC110716629;LOC110716704;LOC110711922;LOC110731823;LOC110731824;LOC110684487;LOC110733789;LOC110693997;LOC110711748;LOC110684270;LOC110684274;LOC110739444;LOC110689623;LOC110715077;LOC110696622;LOC110696625;LOC110696624;LOC110714887;LOC110716572;LOC110716573;novel.6721;novel.6722;novel.11963;novel.2008;novel.4252;LOC110710661;LOC110719538;LOC110702412;LOC110731547;LOC110714053;LOC11…	K13356+K13407+K15398+K15400+K15401+K15402+K15403+K15404+K15405+K15406+K17991+K20495+K20769+K21995
Steroid biosynthesis	ko00100	LOC110687958;LOC110726750;LOC110709402;LOC110729390;LOC110720379;LOC110728228;LOC110725405;LOC110725245;LOC110692968;LOC110732064;LOC110682470;LOC110719994;LOC110685768;LOC110702765;LOC110705694;LOC110718885;LOC110718886;LOC110718883;LOC110705161;LOC110705162;LOC110705164;LOC110705167;LOC110731960;LOC110718813;LOC110726116;LOC110701952;LOC110716456;LOC110698492;LOC110691899;LOC110691898;LOC110725…	K00213+K00222+K00227+K00511+K00559+K00801+K01052+K01824+K01853+K05917+K07748+K08242+K08246+K09828+K09832+K14423+K14424+K14674+K23558
Ubiquinone and other terpenoid-quinone biosynthesis	ko00130	LOC110691906;LOC110701960;LOC110738206;LOC110684642;LOC110684225;LOC110710327;LOC110683790;LOC110696844;LOC110699670;LOC110686958;LOC110709357;LOC110722546;LOC110683880;LOC110720298;LOC110685206;LOC110706509;LOC110697332;LOC110687661;LOC110703874;LOC110709569;LOC110700147;LOC110700148;LOC110730620;LOC110735976;LOC110690370;LOC110704669;LOC110734950;LOC110681596;LOC110737625;LOC110732609;LOC110714…	K00457+K00487+K00591+K00815+K01661+K01904+K02552+K03809+K05928+K06125+K06126+K06127+K09833+K09834+K12501+K12502+K14759+K14760+K17872+K18534+K18606+K19222+K23094+K23095
Oxidative phosphorylation	ko00190	LOC110695377;LOC110736916;LOC110682479;LOC110685786;LOC110686912;LOC110708623;LOC110717784;LOC110740304;LOC110681710;LOC110711834;novel.1981;LOC110687516;LOC110702017;LOC110719255;LOC110727198;LOC110702632;novel.4171;LOC110703539;novel.386;LOC110686694;LOC110700442;novel.10958;novel.1174;LOC110711113;LOC110685511;LOC110723135;LOC110692236;LOC110704521;LOC110709499;LOC110729446;LOC110695732;LOC110…	K00234+K00235+K00236+K00411+K00412+K00413+K00416+K00417+K00419+K01507+K01535+K02108+K02109+K02110+K02111+K02112+K02113+K02114+K02115+K02128+K02132+K02133+K02134+K02135+K02136+K02137+K02138+K02140+K02144+K02145+K02146+K02147+K02148+K02149+K02150+K02151+K02152+K02153+K02154+K02155+K02256+K02257+K02258+K02259+K02260+K02261+K02262+K02265+K02266+K02267+K03661+K03878+K03879+K03880+K03881+K03882+K03883+…
Photosynthesis	ko00195	CDC77_pgp076;novel.1546;novel.3091;novel.3354;novel.4854;novel.4974;novel.5122;LOC110733603;LOC110705233;CDC77_pgp078;novel.6023;novel.9071;novel.9323;CDC77_pgp077;CDC77_pgp079;novel.8294;novel.2414;novel.2415;novel.10428;novel.10805;novel.3975;CDC77_pgp057;novel.684;novel.5282;novel.5283;LOC110711486;LOC110731711;LOC110690504;novel.11526;CDC77_pgp056;novel.409;LOC110723845;LOC110739775;LOC110731…	K02108+K02109+K02110+K02111+K02112+K02113+K02114+K02115+K02634+K02635+K02636+K02637+K02638+K02639+K02640+K02641+K02689+K02690+K02691+K02692+K02693+K02694+K02695+K02696+K02697+K02698+K02699+K02701+K02703+K02704+K02705+K02706+K02707+K02708+K02709+K02710+K02711+K02712+K02714+K02716+K02717+K02718+K02721+K02723+K02724+K03541+K03542+K03689+K08901+K08902+K08903+K08905+K08906+K14332
Photosynthesis - antenna proteins	ko00196	LOC110738975;LOC110735177;LOC110718557;LOC110705508;LOC110721821;LOC110740226;LOC110715809;LOC110699013;LOC110719798;LOC110700609;LOC110726440;LOC110720895;LOC110723597;LOC110684166;LOC110715346;LOC110688521;LOC110728613;LOC110690396;LOC110701888;LOC110691840;LOC110693197;LOC110723686;LOC110732433;LOC110730276;LOC110732182;LOC110712188;LOC110731582;LOC110714610;LOC110716860;LOC110716576;LOC110699…	K08907+K08908+K08909+K08910+K08911+K08912+K08913+K08914+K08915+K08916+K08917+K14172
Arginine biosynthesis	ko00220	LOC110727303;LOC110739185;LOC110707529;LOC110704768;LOC110738146;LOC110699581;LOC110717694;LOC110689260;LOC110738983;LOC110734705;LOC110730565;LOC110688707;LOC110715087;LOC110708548;LOC110714584;LOC110733645;LOC110705751;LOC110689450;LOC110710831;LOC110688024;LOC110726706;LOC110726705;novel.6409;LOC110698595;LOC110704955;LOC110714571;LOC110685341;LOC110685313;LOC110710592;LOC110709914;LOC11071260…	K00145+K00261+K00262+K00611+K00620+K00811+K00814+K00818+K00930+K01427+K01438+K01476+K01755+K01915+K01940+K13427+K14272+K14454+K14455+K14677+K14682
Purine metabolism	ko00230	LOC110708517;LOC110698328;LOC110734420;novel.2694;LOC110696016;LOC110696014;LOC110696015;LOC110688703;LOC110736203;novel.7980;LOC110737418;LOC110723244;LOC110703900;LOC110684002;LOC110692204;LOC110682811;LOC110691812;LOC110692988;LOC110733606;LOC110732750;LOC110726847;LOC110696543;LOC110695521;LOC110682746;LOC110724417;LOC110705268;LOC110704621;LOC110735639;LOC110704175;LOC110710148;LOC110681985;…	K00088+K00106+K00365+K00601+K00602+K00759+K00760+K00764+K00856+K00860+K00873+K00939+K00940+K00942+K00948+K00951+K00988+K01081+K01427+K01466+K01487+K01488+K01490+K01510+K01513+K01517+K01519+K01522+K01756+K01835+K01923+K01933+K01939+K01945+K01951+K01952+K02083+K03787+K06928+K10807+K10808+K11808+K13484+K13811+K14641+K14977+K18151+K18447+K18453+K18532+K24242
Caffeine metabolism	ko00232	LOC110696016;LOC110696014;LOC110696015;LOC110688703;LOC110736203;novel.7980;LOC110737418;LOC110723244	K00106+K00365
Pyrimidine metabolism	ko00240	LOC110699514;LOC110706070;LOC110728534;LOC110705267;LOC110723892;LOC110720919;LOC110687311;LOC110685382;LOC110714100;LOC110691857;LOC110701904;LOC110718277;LOC110712494;LOC110684279;LOC110711042;LOC110686026;LOC110694413;LOC110707063;LOC110735152;LOC110738994;LOC110720930;LOC110689632;novel.4958;LOC110720496;LOC110727451;LOC110687903;LOC110722512;LOC110726803;LOC110721544;LOC110721543;LOC11069293…	K00207+K00254+K00609+K00761+K00857+K00876+K00940+K00943+K01081+K01240+K01431+K01464+K01465+K01489+K01493+K01510+K01513+K01520+K01937+K01955+K01956+K03787+K09903+K10807+K10808+K13421+K13800+K13998+K14641+K16066+K16329+K16904+K24242
Alanine, aspartate and glutamate metabolism	ko00250	LOC110707529;LOC110704768;LOC110738146;LOC110699581;LOC110696098;LOC110728845;LOC110700051;LOC110709450;LOC110735282;LOC110726497;LOC110700549;LOC110723892;LOC110720919;LOC110687311;LOC110710148;LOC110681985;LOC110707391;LOC110695154;LOC110683714;LOC110733645;LOC110705751;LOC110689450;LOC110710831;LOC110688024;LOC110726706;LOC110726705;novel.6409;LOC110718341;LOC110734765;LOC110702918;LOC11071901…	K00261+K00262+K00264+K00278+K00294+K00609+K00764+K00811+K00814+K00820+K00827+K00830+K01580+K01755+K01756+K01915+K01939+K01940+K01953+K01955+K01956+K13051+K13566+K14272+K14454+K14455+K16871+K17761
Aflatoxin biosynthesis	ko00254	LOC110710337;LOC110686435;LOC110682789;LOC110696502	K11262
Glycine, serine and threonine metabolism	ko00260	LOC110683503;LOC110688224;LOC110713319;LOC110706145;LOC110714536;LOC110718784;LOC110731579;LOC110716502;LOC110725219;LOC110731842;LOC110714579;LOC110695300;LOC110717262;LOC110682130;LOC110712679;LOC110719514;LOC110697132;LOC110702514;LOC110729730;LOC110706325;LOC110720498;LOC110686716;LOC110736714;LOC110697273;LOC110698516;LOC110685989;LOC110738238;LOC110700462;LOC110700461;LOC110704857;novel.622…	K00003+K00058+K00108+K00130+K00133+K00276+K00281+K00306+K00382+K00499+K00600+K00605+K00827+K00830+K00831+K00872+K00928+K01079+K01620+K01695+K01696+K01733+K01754+K01834+K02437+K06001+K12235+K12524+K14085+K14272+K15633+K15634+K15893+K15918+K15919+K16066
Monobactam biosynthesis	ko00261	LOC110701987;LOC110691938;LOC110711245;LOC110729025;LOC110697313;LOC110706314;LOC110702965;LOC110727489;LOC110690468;LOC110711820;novel.9395;LOC110693891;LOC110729568;LOC110727432;LOC110716539;LOC110715844;LOC110709362;LOC110685269;LOC110736607;LOC110692934;novel.5973;LOC110686377;LOC110719745;LOC110688716;LOC110728420;LOC110728719	K00133+K00215+K00928+K01714+K12524+K13811
Cysteine and methionine metabolism	ko00270	LOC110683503;LOC110688224;LOC110732766;LOC110704635;novel.603;LOC110703738;LOC110707421;LOC110714132;LOC110721337;LOC110689431;LOC110718311;LOC110686902;LOC110686158;LOC110722334;LOC110689818;LOC110685538;LOC110728589;LOC110712575;LOC110726448;LOC110700602;LOC110737759;LOC110713319;LOC110706145;LOC110714536;LOC110718784;LOC110731579;LOC110716502;LOC110725219;LOC110731842;LOC110714579;LOC110701987…	K00003+K00016+K00025+K00026+K00058+K00133+K00547+K00549+K00558+K00640+K00641+K00789+K00797+K00811+K00815+K00826+K00827+K00831+K00837+K00899+K00928+K01011+K01244+K01251+K01611+K01738+K01739+K01760+K01761+K01762+K01919+K05396+K05933+K08963+K08967+K12524+K13034+K14454+K14455+K16054+K17398+K20772+K21456+K22207+K22846+K23977
Valine, leucine and isoleucine degradation	ko00280	LOC110709661;LOC110690933;LOC110709765;LOC110706609;LOC110712714;LOC110709659;LOC110709658;LOC110718646;LOC110709660;LOC110706612;LOC110706613;LOC110706610;LOC110706611;LOC110706614;LOC110694500;LOC110707685;LOC110727308;LOC110706487;LOC110709657;LOC110681646;novel.10528;LOC110700413;LOC110701311;LOC110694133;LOC110694135;LOC110694134;LOC110736845;LOC110738449;LOC110709762;LOC110693069;LOC1107082…	K00020+K00128+K00140+K00166+K00167+K00249+K00253+K00382+K00626+K00826+K00827+K01640+K01641+K01692+K01968+K01969+K05605+K05607+K07513+K09699+K14085+K18660+K23146
Valine, leucine and isoleucine biosynthesis	ko00290	LOC110704941;LOC110698604;LOC110712629;LOC110739539;LOC110725888;LOC110686046;LOC110739732;LOC110686173;LOC110692325;LOC110692373;LOC110692375;LOC110691105;LOC110719991;LOC110722530;LOC110732056;LOC110690904;LOC110690905;LOC110717418;LOC110738706;LOC110708895;LOC110726305;LOC110703956;LOC110695356;LOC110739718;novel.1595;LOC110736370;LOC110731857;LOC110738678;LOC110701040;LOC110728103;LOC11071763…	K00052+K00053+K00826+K01649+K01652+K01653+K01687+K01703+K01704+K01754
Lysine biosynthesis	ko00300	LOC110683503;LOC110688224;LOC110701987;LOC110691938;LOC110711245;LOC110729025;LOC110697313;LOC110706314;LOC110702965;LOC110727489;LOC110690468;LOC110711820;novel.9395;LOC110705119;LOC110698437;LOC110693891;LOC110729568;LOC110738354;LOC110716401;LOC110694480;novel.11114;LOC110696485;LOC110695149;LOC110712709;LOC110685264;LOC110734213;LOC110696422;LOC110682809;LOC110704199;LOC110684846;LOC110732956…	K00003+K00133+K00215+K00928+K01586+K01714+K01778+K10206+K12524
Lysine degradation	ko00310	LOC110700413;LOC110701311;LOC110694133;LOC110694135;LOC110694134;LOC110736845;LOC110738449;LOC110709762;LOC110693069;LOC110708205;LOC110698476;LOC110727043;LOC110685890;LOC110736643;LOC110738545;LOC110700723;LOC110696022;LOC110696021;LOC110734499;LOC110726323;LOC110691425;LOC110697691;LOC110724605;LOC110685874;LOC110701762;LOC110702751;LOC110708691;LOC110686663;LOC110708489;novel.1084;novel.10722…	K00128+K00306+K00382+K00626+K00658+K01692+K09188+K11420+K11422+K11426+K11430+K11433+K14085+K14157+K15588+K18826+K22748+K23700+K24405+K24406
Arginine and proline metabolism	ko00330	LOC110700413;LOC110701311;LOC110694133;LOC110694135;LOC110694134;LOC110736845;LOC110738449;LOC110709762;LOC110693069;LOC110708205;LOC110698476;LOC110727043;LOC110685890;LOC110736643;LOC110738545;LOC110700723;LOC110696022;LOC110696021;LOC110734499;LOC110726323;LOC110691425;LOC110697691;LOC110724605;LOC110685874;LOC110701762;LOC110702751;LOC110708691;LOC110686663;LOC110708489;novel.1084;novel.10722…	K00128+K00286+K00294+K00318+K00472+K00797+K00811+K00819+K01259+K01426+K01476+K01583+K01611+K10536+K12251+K12259+K12657+K13366+K13427+K14085+K14454+K14455+K17839
Histidine metabolism	ko00340	LOC110736158;LOC110695974;LOC110700413;LOC110701311;LOC110694133;LOC110694135;LOC110694134;LOC110736845;LOC110738449;LOC110709762;LOC110693069;LOC110708205;LOC110698476;LOC110727043;LOC110685890;LOC110736643;LOC110738545;LOC110700723;LOC110696022;LOC110696021;LOC110734499;LOC110726323;LOC110691425;LOC110697691;LOC110724605;LOC110685874;LOC110701762;LOC110702751;LOC110708691;LOC110686663;LOC110708…	K00013+K00128+K00765+K00817+K01663+K01693+K01814+K11755+K14085+K14152+K18649+K19787
Tyrosine metabolism	ko00350	LOC110733184;LOC110708308;LOC110700134;LOC110709669;LOC110721625;LOC110721627;LOC110689684;LOC110699087;LOC110728039;LOC110699058;LOC110699057;novel.1883;LOC110727457;LOC110699680;LOC110694706;LOC110712357;LOC110724736;LOC110709299;LOC110696815;LOC110713448;LOC110737814;LOC110709286;LOC110692771;LOC110732717;LOC110713596;LOC110700850;LOC110684851;LOC110712386;novel.7308;novel.1920;LOC110706721;LO…	K00001+K00121+K00276+K00422+K00451+K00457+K00811+K00815+K00817+K01555+K01557+K01593+K01800+K02510+K07253+K14454+K14455+K15849+K18606+K18857
Phenylalanine metabolism	ko00360	LOC110737668;LOC110690302;LOC110727457;LOC110699680;LOC110694706;LOC110712357;LOC110724736;LOC110709299;LOC110696815;LOC110713448;LOC110737814;LOC110709286;LOC110692771;LOC110732717;LOC110713596;LOC110700850;LOC110684851;LOC110712386;novel.7308;novel.1920;LOC110691906;LOC110701960;LOC110738206;LOC110733645;LOC110705751;LOC110689450;LOC110710831;LOC110686958;LOC110709357;LOC110722546;LOC110683880;…	K00074+K00276+K00457+K00811+K00815+K00817+K01426+K01593+K01692+K07253+K10775+K14454+K14455+K15849+K18606
Tryptophan metabolism	ko00380	LOC110700413;LOC110701311;LOC110694133;LOC110694135;LOC110694134;LOC110736845;LOC110738449;LOC110709762;LOC110693069;LOC110708205;LOC110698476;LOC110727043;LOC110685890;LOC110736643;LOC110738545;LOC110700723;LOC110696022;LOC110696021;LOC110734499;LOC110726323;LOC110691425;LOC110697691;LOC110724605;LOC110685874;LOC110701762;LOC110702751;LOC110708691;LOC110686663;LOC110708489;novel.1084;novel.10722…	K00128+K00382+K00626+K00658+K00837+K01426+K01593+K01692+K03781+K11816+K11818+K11820+K11868+K13066+K14085+K16903+K22450+K22588+K23947+K24541
Phenylalanine, tyrosine and tryptophan biosynthesis	ko00400	LOC110686622;LOC110700375;LOC110714614;LOC110721443;LOC110733645;LOC110705751;LOC110689450;LOC110710831;LOC110686958;LOC110709357;LOC110722546;LOC110683880;LOC110720298;LOC110685206;LOC110706509;LOC110697332;LOC110687661;LOC110703874;LOC110709569;LOC110700147;LOC110700148;LOC110730620;LOC110735976;LOC110690370;LOC110704669;LOC110734950;LOC110681596;LOC110737625;LOC110732609;LOC110714214;LOC110724…	K00766+K00800+K00811+K00815+K00817+K00891+K01609+K01626+K01657+K01658+K01695+K01696+K01735+K01736+K01817+K01850+K05359+K06001+K13832+K14454+K14455+K15227+K15849
Benzoxazinoid biosynthesis	ko00402	LOC110693057;LOC110695795;LOC110732909;LOC110695790;LOC110697430;LOC110693060;LOC110693061;LOC110693062;LOC110693063;LOC110738199;LOC110714563;LOC110714562;LOC110714567;LOC110714565;LOC110714564;LOC110725016;LOC110725014;LOC110717756;LOC110704435;LOC110717552;LOC110713641;LOC110717938;LOC110702737;LOC110702736;LOC110717628;LOC110734378;LOC110697292;LOC110728057;LOC110718176;LOC110695786;LOC110695…	K13229
beta-Alanine metabolism	ko00410	LOC110700413;LOC110701311;LOC110694133;LOC110694135;LOC110694134;LOC110736845;LOC110738449;LOC110709762;LOC110693069;LOC110708205;LOC110698476;LOC110727043;LOC110685890;LOC110736643;LOC110738545;LOC110700723;LOC110696022;LOC110696021;LOC110734499;LOC110726323;LOC110691425;LOC110697691;LOC110724605;LOC110685874;LOC110701762;LOC110702751;LOC110708691;LOC110686663;LOC110708489;novel.1084;novel.10722…	K00128+K00140+K00207+K00232+K00276+K01431+K01464+K01578+K01580+K01692+K01918+K05605+K12259+K13366+K14085+K17839+K23146
Taurine and hypotaurine metabolism	ko00430	LOC110695063;LOC110695061;LOC110681893;LOC110681895;LOC110733955;LOC110733228;LOC110718614;LOC110740036;LOC110730056;LOC110690894;novel.7240;novel.8181	K01580+K18592
Phosphonate and phosphinate metabolism	ko00440	LOC110692296;LOC110690874;LOC110727987;LOC110689739;LOC110695112;LOC110681950;LOC110720652;LOC110728152;LOC110701260;LOC110686002;LOC110686003;LOC110686004;LOC110720630;LOC110685624;LOC110720610;LOC110736677;LOC110736585;LOC110736769;LOC110736854;LOC110724869;LOC110724652;LOC110694336;novel.10557;novel.10558;novel.175;novel.176;novel.4221	K00967+K00968+K00993
Selenocompound metabolism	ko00450	LOC110707301;LOC110707143;LOC110714297;LOC110718053;LOC110735958;LOC110735922;LOC110716514;LOC110702310;LOC110710264;LOC110726047;LOC110693397;LOC110710842;LOC110695302;LOC110734487;LOC110706111;LOC110722141;LOC110716375;LOC110694354;LOC110699070;LOC110717609;LOC110691520;LOC110693677;LOC110693678;LOC110710245;LOC110699067;LOC110706748;LOC110685209;LOC110691373;LOC110710447;LOC110695847;LOC110727…	K00384+K00549+K01739+K01760+K01761+K01874+K08247+K11717+K13811
Cyanoamino acid metabolism	ko00460	LOC110711741;LOC110737110;LOC110715370;LOC110706418;LOC110708407;LOC110712734;LOC110713544;LOC110705476;LOC110709837;LOC110724681;LOC110714912;LOC110715519;LOC110694498;LOC110724430;LOC110705473;LOC110739183;novel.86;LOC110712919;LOC110727876;LOC110717033;LOC110739313;LOC110736156;LOC110722071;LOC110697973;LOC110687098;LOC110736157;LOC110691404;LOC110691406;LOC110691407;LOC110712935;LOC110691641;…	K00600+K01188+K01455+K05349+K05350+K08248+K13034+K13035+K13051+K16266+K18592+K20802+K22706
Glutathione metabolism	ko00480	LOC110709946;LOC110738987;LOC110730344;LOC110682185;LOC110724429;LOC110699928;LOC110718165;LOC110735157;LOC110704601;LOC110689308;LOC110686033;LOC110719631;LOC110720997;LOC110722639;LOC110701214;LOC110736542;LOC110694143;LOC110711355;LOC110690517;LOC110707471;LOC110700522;LOC110735027;LOC110723091;novel.7145;novel.968;novel.3541;LOC110734408;LOC110692523;LOC110728942;LOC110727313;LOC110725530;LOC…	K00031+K00033+K00036+K00383+K00432+K00434+K00797+K00799+K01255+K01256+K01469+K01919+K10807+K10808+K11188+K18592+K21456+K21888+K22596
Starch and sucrose metabolism	ko00500	LOC110725765;LOC110711381;LOC110681817;LOC110688321;LOC110686080;LOC110717307;LOC110721496;LOC110690515;LOC110719385;LOC110694658;LOC110702579;LOC110685902;LOC110683405;LOC110735084;LOC110722127;LOC110686141;novel.1677;LOC110721833;LOC110708258;LOC110689796;LOC110713856;LOC110711114;LOC110713058;LOC110727927;LOC110684034;LOC110715868;LOC110725575;LOC110733612;LOC110708009;LOC110705371;LOC11068469…	K00688+K00695+K00696+K00700+K00703+K00705+K00706+K00750+K00844+K00847+K00963+K00975+K01087+K01176+K01177+K01179+K01187+K01188+K01193+K01194+K01210+K01214+K01513+K01810+K01835+K05349+K05350+K07024+K13679+K16055+K18447+K19891+K19892+K19893
N-Glycan biosynthesis	ko00510	LOC110702793;LOC110737833;LOC110681815;novel.1362;LOC110715289;LOC110724558;LOC110697350;LOC110729313;LOC110719491;LOC110705986;LOC110702492;novel.3974;LOC110691806;LOC110730829;LOC110709383;LOC110704008;LOC110707978;LOC110725604;LOC110712611;LOC110695611;LOC110739644;LOC110732107;LOC110703911;LOC110730924;LOC110691721;novel.568;novel.569;LOC110691577;LOC110714346;LOC110707363;novel.2176;novel.36…	K00721+K00726+K00729+K00736+K00737+K00778+K00779+K00902+K01001+K01228+K01230+K01231+K03842+K03843+K03844+K03845+K03846+K03847+K03848+K03849+K03850+K05546+K07151+K07252+K07432+K07441+K09658+K09659+K12345+K12666+K12667+K12668+K12669+K12670+K23741
Other glycan degradation	ko00511	LOC110738385;LOC110718394;LOC110731870;LOC110727208;LOC110727206;LOC110725312;LOC110729137;LOC110702621;LOC110702620;LOC110724597;LOC110694719;LOC110705346;LOC110713960;LOC110728088;LOC110710460;LOC110707887;LOC110701213;LOC110712448;LOC110685305;LOC110709565;LOC110732986;LOC110715824;LOC110714226;LOC110703041;LOC110734232;LOC110736541;LOC110716322;LOC110690648;LOC110694397;LOC110736840;LOC110712…	K01190+K01191+K01206+K01227+K01444+K12309+K12373+K15923+K17108
Various types of N-glycan biosynthesis	ko00513	LOC110681815;novel.1362;LOC110691806;LOC110730829;LOC110698592;LOC110704959;LOC110729516;LOC110733319;LOC110726734;LOC110717460;LOC110698393;LOC110702367;LOC110739095;LOC110687976;LOC110690756;LOC110737349;LOC110719426;LOC110726574;LOC110722047;LOC110734685;LOC110717617;LOC110712660;LOC110695270;LOC110682102;LOC110708522;LOC110722311;LOC110724888;LOC110715303;LOC110705963;novel.2301;LOC110691945;…	K00726+K00736+K00753+K01230+K01231+K03714+K03842+K03843+K03844+K03845+K03846+K03847+K07151+K07432+K07441+K12373+K12666+K12667+K12668+K12669+K12670+K14412+K14413+K23741
Other types of O-glycan biosynthesis	ko00514	LOC110684967;LOC110733659;LOC110705902;LOC110739960;LOC110739644;LOC110732107;LOC110703911;LOC110726694;LOC110688013;LOC110711709;LOC110729824;LOC110714907;LOC110701414;LOC110736736;LOC110730969;LOC110686017;LOC110685388;LOC110685389;LOC110685301;LOC110685307;LOC110685304;LOC110685309;LOC110688260;LOC110714102;LOC110729660;LOC110714657;LOC110714658;LOC110683464;LOC110712777;LOC110714331;LOC110714…	K00728+K00778+K00779+K03691+K09667+K13667+K20781+K20782+K20783+K20784
Mannose type O-glycan biosynthesis	ko00515	LOC110684967;LOC110733659;LOC110705902;LOC110739960	K00728
Amino sugar and nucleotide sugar metabolism	ko00520	LOC110726369;LOC110700674;LOC110724483;LOC110724482;LOC110712121;LOC110711971;LOC110686899;LOC110686138;LOC110724593;LOC110711965;LOC110722102;LOC110737278;LOC110735086;LOC110711994;LOC110717323;novel.2452;LOC110688216;LOC110707899;LOC110707895;LOC110683514;LOC110708131;LOC110729150;LOC110729180;LOC110709505;LOC110700018;novel.5879;novel.10153;LOC110729464;LOC110695719;LOC110688586;LOC110727963;L…	K00012+K00326+K00621+K00770+K00820+K00844+K00847+K00963+K00965+K00966+K00972+K00975+K01097+K01183+K01209+K01711+K01784+K01809+K01810+K01835+K01836+K01840+K02377+K05305+K06118+K08678+K08679+K10046+K12373+K12446+K12447+K12448+K12449+K12450+K12451+K13379+K13648+K15920+K16190+K17497+K18677+K20547
Polyketide sugar unit biosynthesis	ko00523	LOC110719436;LOC110702522	K12451
Neomycin, kanamycin and gentamicin biosynthesis	ko00524	LOC110690932;LOC110688727;LOC110715552;LOC110729879;LOC110729878;LOC110717167;LOC110707684;LOC110715383;LOC110736264;LOC110686362;LOC110729881;novel.6953;novel.10107;novel.11697;novel.4692	K00844
Glycosaminoglycan degradation	ko00531	LOC110702828;LOC110705699;novel.6174;novel.6939;novel.9729;LOC110685651;LOC110722142;LOC110708041;LOC110733623;LOC110705441;LOC110726389;LOC110700661;LOC110725531;LOC110705461;LOC110689755;LOC110736847;LOC110724827;LOC110699546;LOC110708689;LOC110727971;LOC110731430;LOC110697520;novel.1346;novel.498;LOC110684323;LOC110684321;LOC110719857;LOC110719858;LOC110705327;LOC110684258;LOC110725272;LOC1106…	K01205+K07964+K10532+K12309+K12373
Glycerolipid metabolism	ko00561	LOC110735383;LOC110717704;LOC110689345;LOC110725809;LOC110738731;LOC110717695;LOC110698203;LOC110698202;LOC110733825;LOC110733826;LOC110730407;LOC110719370;LOC110698365;LOC110702595;novel.402;novel.403;LOC110700413;LOC110701311;LOC110694133;LOC110694135;LOC110694134;LOC110736845;LOC110738449;LOC110709762;LOC110693069;LOC110708205;LOC110698476;LOC110727043;LOC110685890;LOC110736643;LOC110738545;LO…	K00002+K00128+K00630+K00655+K00679+K00863+K00864+K00901+K01054+K03715+K06118+K06119+K07407+K09480+K11155+K13506+K13508+K13513+K13519+K13523+K14085+K14674+K15728+K15918+K18693+K21362+K22848+K22849+K22920+K24189
Inositol phosphate metabolism	ko00562	LOC110722815;LOC110732354;LOC110734335;LOC110682104;LOC110727650;LOC110740061;LOC110694264;LOC110685080;LOC110685083;LOC110717313;LOC110717312;novel.5877;novel.7830;novel.9823;novel.5239;novel.5240;LOC110692313;LOC110729903;LOC110715390;LOC110690892;LOC110728708;LOC110736831;LOC110698493;LOC110705057;novel.6790;LOC110685657;LOC110695655;LOC110714441;LOC110686324;LOC110715467;LOC110686123;LOC11070…	K00010+K00140+K00469+K00888+K00889+K00913+K00914+K00915+K00921+K00999+K01092+K01099+K01106+K01110+K01114+K01765+K01803+K01858+K03103+K05857+K10047+K10572+K13711+K15422+K18081+K18649+K19517+K19801+K21797+K22913+K24221
Glycosylphosphatidylinositol (GPI)-anchor biosynthesis	ko00563	LOC110691002;LOC110732695;LOC110707761;novel.8;novel.7;LOC110692778;LOC110740252;LOC110705536;LOC110682164;LOC110718308;LOC110705942;LOC110738143;LOC110699584;LOC110685457;LOC110707381;LOC110701700;LOC110730698;LOC110724401;LOC110688016;LOC110726452;LOC110709875;LOC110700596;LOC110739855;LOC110686323;LOC110726698;LOC110735134;LOC110736272;LOC110701750;LOC110717170;LOC110686448;LOC110686449;LOC110…	K03434+K03857+K03858+K03859+K03860+K03861+K05283+K05284+K05285+K05286+K05287+K05288+K05289+K05290+K05291+K05292+K05293+K05294+K05310+K07541+K07542+K09658+K11001+K23362
Glycerophospholipid metabolism	ko00564	LOC110716326;LOC110704400;LOC110706017;LOC110683250;LOC110718097;LOC110709482;LOC110700587;LOC110716616;LOC110691559;LOC110682679;LOC110707339;LOC110704449;LOC110723206;LOC110685470;novel.560;novel.6412;novel.8394;novel.1467;LOC110721623;LOC110699059;LOC110684978;LOC110730114;LOC110732611;LOC110683493;LOC110687258;LOC110737959;LOC110694459;LOC110689141;LOC110734987;LOC110727988;LOC110717824;LOC11…	K00006+K00111+K00550+K00630+K00655+K00894+K00901+K00967+K00968+K00981+K00993+K00995+K00999+K01047+K01094+K01114+K01115+K01126+K01517+K01613+K05929+K06123+K06129+K06130+K08730+K08744+K13506+K13508+K13510+K13511+K13513+K13519+K13523+K14156+K14674+K15728+K16818+K16860+K18693+K18696+K22389+K25193
Ether lipid metabolism	ko00565	LOC110720652;LOC110728152;LOC110701260;LOC110686002;LOC110686003;LOC110686004;LOC110720630;LOC110685624;LOC110720610;LOC110736677;LOC110736585;LOC110736769;LOC110736854;LOC110724869;LOC110724652;LOC110694336;novel.10557;novel.10558;novel.175;novel.176;novel.4221;LOC110692290;LOC110690870;LOC110690871;LOC110716699;LOC110692289;LOC110716935;LOC110701323;LOC110694497;LOC110718902;LOC110736660;LOC110…	K00993+K01047+K01062+K01114+K01115+K06123+K13510+K13519+K14674+K16860
Arachidonic acid metabolism	ko00590	LOC110698550;LOC110704321;LOC110690444;LOC110709284;LOC110738715;LOC110728610;LOC110717863;LOC110712174;LOC110717708;LOC110694961;LOC110689282;LOC110723057;LOC110713635;LOC110713461;LOC110719383;LOC110719444;LOC110719442;LOC110694112;LOC110691317;LOC110694668;LOC110713462;LOC110702445;LOC110702440;novel.9064;novel.1525;LOC110692290;LOC110690870;LOC110690871;LOC110716699;LOC110692289;LOC110716935;…	K00079+K00432+K01047+K01254+K05309+K08726+K14674+K15730+K18592
Linoleic acid metabolism	ko00591	LOC110718504;LOC110710574;LOC110716839;LOC110688078;LOC110736163;LOC110736162;LOC110696152;LOC110684391;LOC110736160;LOC110737176;LOC110695975;LOC110695976;LOC110695977;LOC110718526;LOC110691689;LOC110712524;novel.1310;LOC110692290;LOC110690870;LOC110690871;LOC110716699;LOC110692289;LOC110716935;LOC110707389;LOC110710668;LOC110685451;LOC110691166;LOC110716883;LOC110689454;LOC110689455;LOC11070889…	K00454+K01047+K14674+K15718
alpha-Linolenic acid metabolism	ko00592	LOC110739720;LOC110702795;LOC110687796;LOC110703413;LOC110703412;LOC110703416;LOC110703415;LOC110703414;LOC110687794;novel.6362;LOC110689989;LOC110732363;LOC110682188;LOC110718230;LOC110710870;LOC110722825;LOC110733915;novel.8772;novel.8773;LOC110718504;LOC110710574;LOC110716839;LOC110688078;LOC110736163;LOC110736162;LOC110696152;LOC110684391;LOC110736160;LOC110737176;LOC110695975;LOC110695976;LO…	K00224+K00232+K00454+K01047+K01723+K05894+K07513+K08241+K10525+K10526+K10527+K10528+K14674+K16818+K18857+K22389
Sphingolipid metabolism	ko00600	LOC110721225;LOC110739645;LOC110733305;LOC110727223;LOC110720026;LOC110703912;novel.8875;novel.10968;LOC110738385;LOC110718394;LOC110711278;LOC110690522;LOC110703806;LOC110682276;LOC110717532;LOC110730115;LOC110732612;LOC110705562;LOC110687436;LOC110687434;LOC110714783;LOC110711634;LOC110731264;novel.3622;LOC110706890;LOC110693600;LOC110712391;LOC110690397;LOC110717570;LOC110689306;LOC110731576;L…	K00654+K01190+K01634+K04708+K04711+K04712+K04713+K04715+K04718+K07407+K12309+K12349+K12382+K17108+K23451+K24621
Glycosphingolipid biosynthesis - lacto and neolacto series	ko00601	LOC110706872;LOC110691583;LOC110693584;LOC110696599;LOC110685033;novel.5234	K01988
Glycosphingolipid biosynthesis - globo and isoglobo series	ko00603	LOC110706872;LOC110691583;LOC110693584;LOC110696599;LOC110685033;novel.5234;LOC110731937;LOC110716274;LOC110691668;LOC110731903;LOC110731826;LOC110737600;LOC110738327;LOC110712621;LOC110730743;LOC110712098;LOC110708843;LOC110685138;LOC110702784;LOC110740021;LOC110723176;LOC110693101;LOC110691841;LOC110721233;LOC110690794;LOC110709651;LOC110704478;LOC110688765;LOC110713274;LOC110685034;LOC11070905…	K01988+K07407+K12373
Glycosphingolipid biosynthesis - ganglio series	ko00604	LOC110684323;LOC110684321;LOC110719857;LOC110719858;LOC110705327;LOC110684258;LOC110725272;LOC110691782;LOC110691781;LOC110682558;LOC110739326;LOC110711476;LOC110712875;LOC110685863;LOC110728974;LOC110718536;LOC110684307;LOC110682222;LOC110712018;LOC110723292;LOC110722782;LOC110714282;LOC110717254;LOC110691452;LOC110684076;LOC110695398;LOC110721732;LOC110735856;LOC110705429;LOC110717365;LOC110728…	K12309+K12373
Pyruvate metabolism	ko00620	LOC110733184;LOC110735383;LOC110717704;LOC110689345;LOC110725809;LOC110738731;LOC110717695;LOC110698203;LOC110698202;LOC110733825;LOC110733826;LOC110730407;LOC110719370;LOC110698365;LOC110702595;novel.402;novel.403;LOC110732766;LOC110704635;novel.603;LOC110703738;LOC110707421;LOC110714132;LOC110721337;LOC110689431;LOC110718311;LOC110686902;LOC110686158;LOC110722334;LOC110689818;LOC110685538;LOC11…	K00001+K00002+K00016+K00025+K00026+K00028+K00029+K00051+K00102+K00121+K00128+K00161+K00162+K00382+K00626+K00627+K00873+K01006+K01069+K01512+K01595+K01610+K01638+K01649+K01679+K01759+K01895+K01913+K01961+K01962+K01963+K02160+K11262+K14085+K18857+K18881
Glyoxylate and dicarboxylate metabolism	ko00630	LOC110703738;LOC110707421;LOC110714132;LOC110721337;LOC110689431;LOC110718311;LOC110686902;LOC110686158;LOC110722334;LOC110689818;LOC110685538;LOC110728589;LOC110712575;LOC110726448;LOC110700602;LOC110737759;LOC110734533;LOC110734723;LOC110705444;LOC110715688;novel.4907;LOC110732751;LOC110710572;LOC110719248;LOC110735599;LOC110730635;LOC110696990;novel.6365;novel.10899;novel.10902;novel.11845;nov…	K00025+K00026+K00122+K00281+K00284+K00382+K00600+K00605+K00626+K00830+K01433+K01455+K01601+K01602+K01637+K01638+K01647+K01681+K01895+K01913+K01915+K02437+K03781+K11517+K14272+K15893+K15918+K15919+K18121+K19269+K22133
Propanoate metabolism	ko00640	LOC110732766;LOC110704635;novel.603;LOC110734335;LOC110682104;LOC110727650;LOC110740061;LOC110694264;LOC110685080;LOC110685083;LOC110717313;LOC110717312;novel.5877;novel.7830;novel.9823;novel.5239;novel.5240;LOC110681990;LOC110685903;LOC110725764;LOC110695160;novel.7812;novel.8282;LOC110696259;LOC110682893;LOC110689989;LOC110732363;LOC110682188;LOC110718230;LOC110710870;LOC110722825;LOC110733915;…	K00016+K00140+K00166+K00167+K00232+K00382+K00626+K01578+K01692+K01895+K01899+K01900+K01961+K01962+K01963+K02160+K05605+K09699+K11262+K23146
Butanoate metabolism	ko00650	LOC110737668;LOC110690302;LOC110714954;LOC110711788;LOC110714898;LOC110711721;LOC110730839;LOC110739610;LOC110691704;LOC110712141;LOC110707017;LOC110692054;LOC110735521;novel.11015;LOC110695063;LOC110695061;LOC110681893;LOC110681895;LOC110733955;LOC110733228;LOC110718614;LOC110740036;LOC110700995;LOC110700990;LOC110711671;LOC110698356;LOC110710537;LOC110736319;LOC110736314;LOC110719437;LOC1107025…	K00074+K00109+K00626+K01580+K01640+K01641+K01652+K01653+K01692+K01913+K16871+K17761+K18121
C5-Branched dibasic acid metabolism	ko00660	LOC110704941;LOC110698604;LOC110703956;LOC110695356;LOC110739718;novel.1595;LOC110736370;LOC110731857;LOC110738678;LOC110701040;LOC110728103;LOC110717632;LOC110737871;LOC110694082;LOC110722818;LOC110722819;LOC110732357;LOC110732818	K00052+K01652+K01653+K01703+K01704
One carbon pool by folate	ko00670	LOC110690008;LOC110714021;LOC110688680;LOC110730177;LOC110688419;LOC110685331;LOC110725032;LOC110732551;LOC110684058;LOC110684060;LOC110685326;LOC110738631;LOC110717761;LOC110714070;LOC110711741;LOC110737110;LOC110715370;LOC110706418;LOC110708407;LOC110712734;LOC110713544;LOC110705476;LOC110709837;LOC110724681;LOC110714912;LOC110715519;LOC110694498;LOC110724430;LOC110705473;LOC110739183;novel.86;…	K00288+K00297+K00600+K00601+K00602+K00604+K00605+K01433+K01934+K01938+K13998
Carbon fixation in photosynthetic organisms	ko00710	LOC110703738;LOC110707421;LOC110714132;LOC110721337;LOC110689431;LOC110718311;LOC110686902;LOC110686158;LOC110722334;LOC110689818;LOC110685538;LOC110728589;LOC110712575;LOC110726448;LOC110700602;LOC110737759;LOC110731508;LOC110721588;LOC110692501;LOC110713881;LOC110720454;LOC110725120;LOC110685325;LOC110685327;LOC110739388;LOC110709067;LOC110715612;LOC110696653;LOC110715103;LOC110690277;LOC110707…	K00025+K00026+K00028+K00029+K00051+K00134+K00615+K00814+K00855+K00927+K01006+K01100+K01595+K01601+K01602+K01610+K01623+K01783+K01803+K01807+K03841+K05298+K14272+K14454+K14455
Thiamine metabolism	ko00730	LOC110692476;LOC110727371;LOC110711388;LOC110696382;LOC110686429;LOC110713889;LOC110699511;LOC110724280;LOC110724286;LOC110707833;LOC110739754;LOC110739759;LOC110691585;LOC110708084;LOC110697579;LOC110706075;LOC110725223;novel.1671;LOC110739218;LOC110727895;LOC110695265;LOC110712145;LOC110728728;LOC110732177;LOC110682096;LOC110713460;LOC110721030;LOC110723750;LOC110683422;LOC110688300;LOC11068616…	K00878+K00939+K00949+K01662+K03146+K03147+K04487+K06928+K06949+K14153+K20896+K22911
Riboflavin metabolism	ko00740	LOC110686898;LOC110685982;LOC110720381;LOC110737502;LOC110717752;LOC110738646;LOC110689213;LOC110734481;LOC110738434;novel.10579;LOC110729062;LOC110706020;LOC110696660;LOC110714105;LOC110716835;LOC110696081;LOC110725157;LOC110712815;LOC110710499;novel.11215;novel.11216;LOC110713985;LOC110714162;LOC110716977;LOC110731521;LOC110736415;LOC110689613;LOC110701084;LOC110737022;LOC110737983;LOC110707082…	K00793+K00794+K00861+K00953+K01513+K11752+K14379+K14652+K18453+K20860+K20884+K22912+K22949
Vitamin B6 metabolism	ko00750	LOC110714136;LOC110733423;LOC110731727;LOC110699257;LOC110726607;LOC110707142;LOC110714393;LOC110735115;LOC110727665;LOC110731053;LOC110691305;LOC110691308;LOC110695329;LOC110684882;LOC110728280;LOC110692388;LOC110711209;LOC110687710;LOC110683212;LOC110715918;LOC110710211;LOC110706791;LOC110719221;LOC110703665;LOC110688837;LOC110696222;LOC110724096;LOC110686328;LOC110691072;LOC110737568;LOC110713…	K00275+K00831+K00868+K01733+K05275+K06215+K08681+K13248+K23998
Nicotinate and nicotinamide metabolism	ko00760	LOC110700051;LOC110709450;LOC110735282;LOC110718214;LOC110682320;LOC110702106;LOC110716285;LOC110736246;LOC110685943;LOC110737856;LOC110702763;LOC110725727;LOC110702874;LOC110696056;LOC110705708;LOC110738606;LOC110698302;LOC110684602;LOC110717343;LOC110724435;LOC110721914;LOC110712916;LOC110706353;LOC110729333;LOC110712921;LOC110695762;LOC110729062;LOC110706020;LOC110696660;LOC110714105;LOC110716…	K00278+K00763+K00767+K00858+K01081+K01240+K01513+K01950+K03426+K03517+K03787+K06210+K11414+K11416+K18551
Pantothenate and CoA biosynthesis	ko00770	LOC110712629;LOC110739539;LOC110725888;LOC110686046;LOC110739732;LOC110700413;LOC110701311;LOC110694133;LOC110694135;LOC110694134;LOC110736845;LOC110738449;LOC110709762;LOC110693069;LOC110708205;LOC110698476;LOC110727043;LOC110685890;LOC110736643;LOC110738545;LOC110700723;LOC110696022;LOC110696021;LOC110734499;LOC110726323;LOC110691425;LOC110697691;LOC110724605;LOC110685874;LOC110701762;LOC110702…	K00053+K00128+K00207+K00606+K00826+K00859+K01431+K01464+K01513+K01598+K01652+K01653+K01687+K01918+K01922+K02201+K06133+K09680+K17839
Biotin metabolism	ko00780	LOC110736931;LOC110736056;LOC110710448;LOC110708609;LOC110716052;LOC110710455;LOC110716101;LOC110725927;LOC110725925;LOC110716066;LOC110711529;LOC110712407;LOC110712365;LOC110707335;LOC110684731;LOC110708610;LOC110707436;LOC110707540;LOC110707542;LOC110707435;LOC110724230;LOC110702855;novel.5805;novel.7097;novel.10699;LOC110686509;LOC110739780;LOC110724264;LOC110725916;LOC110733624;LOC110716051;L…	K00059+K00208+K00652+K01012+K01942+K02372+K09458+K19562
Lipoic acid metabolism	ko00785	LOC110709458;LOC110693562;LOC110736820;LOC110706837;LOC110708712;LOC110700040;novel.626;LOC110709483;LOC110731798;LOC110699633;LOC110700699;LOC110726259;LOC110695951;LOC110736142	K03644+K03801+K23735
Folate biosynthesis	ko00790	LOC110698550;LOC110704321;LOC110690444;LOC110709284;LOC110738715;LOC110728610;LOC110717863;LOC110699107;LOC110685565;LOC110690162;LOC110734036;LOC110737819;LOC110687790;LOC110687789;LOC110703420;LOC110703421;LOC110711108;LOC110688187;LOC110683547;LOC110723899;LOC110720911;LOC110728794;LOC110690220;LOC110707373;LOC110722289;LOC110719963;LOC110710530;LOC110733344;LOC110736333;LOC110701007;LOC110714…	K00079+K01113+K01307+K01495+K01633+K01724+K01930+K03635+K03637+K03639+K13941+K13950+K13998+K14652+K15376+K15631+K18482+K20457
Porphyrin and chlorophyll metabolism	ko00860	LOC110720128;LOC110732154;LOC110685169;LOC110693242;LOC110729700;LOC110697100;LOC110683268;LOC110738973;LOC110735179;LOC110697573;novel.10621;LOC110699008;LOC110688803;LOC110716810;LOC110716634;LOC110733554;LOC110713578;novel.5752;novel.5753;LOC110724612;LOC110709769;LOC110696595;LOC110690110;LOC110718360;LOC110727146;LOC110689016;LOC110731096;LOC110714900;LOC110710517;LOC110716591;LOC110695303;L…	K00218+K00228+K00231+K01599+K01698+K01719+K01749+K01772+K01845+K01885+K02257+K02259+K02303+K02492+K03403+K03404+K03405+K03428+K03794+K04035+K04040+K08099+K08100+K08101+K10960+K13071+K13544+K13545+K13600+K13606+K18010+K19054+K19073+K21480+K22013
Terpenoid backbone biosynthesis	ko00900	LOC110695305;LOC110718708;LOC110696360;LOC110682133;LOC110682124;novel.11150;LOC110686643;LOC110700395;LOC110738183;LOC110734575;LOC110687767;novel.9287;LOC110730839;LOC110739610;LOC110691704;LOC110712141;LOC110707017;LOC110692054;LOC110735521;novel.11015;LOC110707032;LOC110711018;LOC110734855;LOC110707088;LOC110710984;LOC110685191;LOC110731100;LOC110707050;LOC110711024;LOC110693547;LOC110684721;…	K00021+K00099+K00587+K00626+K00787+K00869+K00919+K00938+K00991+K01597+K01641+K01662+K01770+K01823+K03526+K03527+K05356+K05906+K05954+K05955+K06013+K06981+K08658+K10960+K11778+K12742+K13789+K14066+K15889+K15891+K15892
Indole alkaloid biosynthesis	ko00901	LOC110699446;LOC110697752;LOC110688605;LOC110693700;LOC110711866;LOC110728031;LOC110733687;LOC110689692;LOC110687643;novel.11000;novel.11002;LOC110721215;LOC110712824;LOC110710657;LOC110697941;LOC110721239;LOC110692086;LOC110721791;LOC110717738;LOC110683949;LOC110712834;LOC110688185;LOC110738790;LOC110715934;LOC110710600;LOC110683549;LOC110732822;novel.5	K01593+K01757
Monoterpenoid biosynthesis	ko00902	LOC110714023;LOC110686746;LOC110683504;LOC110683509;LOC110716746;LOC110692351;LOC110688225;LOC110725122;LOC110685392;LOC110725057;LOC110713762;LOC110685329;novel.5928;novel.583;novel.11494;LOC110713714;LOC110725202;LOC110682112;LOC110682111;LOC110712416;LOC110713893;LOC110695277;LOC110697997;LOC110727823;novel.7832;novel.7833;LOC110721830;LOC110714295;LOC110719408;LOC110722487;LOC110722488;LOC110…	K15095+K23232+K23810
Limonene and pinene degradation	ko00903	LOC110700413;LOC110701311;LOC110694133;LOC110694135;LOC110694134;LOC110736845;LOC110738449;LOC110709762;LOC110693069;LOC110708205;LOC110698476;LOC110727043;LOC110685890;LOC110736643;LOC110738545;LOC110700723;LOC110696022;LOC110696021;LOC110734499;LOC110726323;LOC110691425;LOC110697691;LOC110724605;LOC110685874;LOC110701762;LOC110702751;LOC110708691;LOC110686663;LOC110708489;novel.1084;novel.10722…	K00128+K01692
Diterpenoid biosynthesis	ko00904	LOC110703048;LOC110704325;LOC110682252;LOC110718729;novel.2169;LOC110692482;LOC110727446;LOC110734165;LOC110685695;LOC110727365;novel.8825;LOC110721299;LOC110722840;LOC110720433;LOC110702167;LOC110720434;LOC110709044;LOC110732376;LOC110702223;LOC110692430;novel.10806;LOC110731530;LOC110707600;LOC110682585;LOC110714071;LOC110730727;LOC110730729;LOC110698722;LOC110712216;LOC110729860;LOC110703310;L…	K04120+K04121+K04122+K04123+K04124+K04125+K05282+K13070+K17961+K17982
Brassinosteroid biosynthesis	ko00905	LOC110722522;LOC110686172;LOC110699265;LOC110714661;LOC110725236;LOC110733431;LOC110703563;LOC110705784;LOC110728074;LOC110707865;LOC110729112;LOC110682556;LOC110685861;LOC110684296;LOC110719834;LOC110698693;LOC110727109;LOC110703285;LOC110729125;LOC110690144;LOC110707879;LOC110686383;LOC110684386;LOC110684388;LOC110688554;LOC110727025;LOC110688548;LOC110684390;LOC110723680;LOC110688079;LOC110683…	K09587+K09588+K09590+K09591+K12637+K12638+K15639+K20623
Carotenoid biosynthesis	ko00906	LOC110708463;LOC110737059;LOC110708255;LOC110737167;LOC110711141;LOC110736106;LOC110695912;novel.7972;LOC110739001;LOC110716617;LOC110718499;LOC110716841;LOC110688003;LOC110726682;LOC110710527;LOC110712816;LOC110683040;LOC110712885;LOC110727363;LOC110690888;LOC110685794;LOC110682488;LOC110723996;LOC110703206;LOC110688863;LOC110739864;novel.7289;LOC110738483;LOC110683094;LOC110688217;LOC110683515;…	K00514+K02291+K02293+K06443+K06444+K09835+K09837+K09838+K09839+K09840+K09841+K09842+K09843+K14595+K15744+K15746+K15747+K17911+K17912+K17913
Zeatin biosynthesis	ko00908	LOC110710147;LOC110712034;LOC110716608;LOC110694024;LOC110710152;LOC110704399;LOC110691570;LOC110724757;LOC110722885;LOC110683076;LOC110723287;LOC110707353;LOC110705378;LOC110712896;LOC110686906;LOC110683634;LOC110719828;LOC110684292;LOC110737758;LOC110729650;LOC110697402;LOC110728199;LOC110720408;LOC110703535;LOC110695030;LOC110691194;LOC110710939;LOC110681628;LOC110711201;LOC110735607;LOC110702…	K00279+K00791+K10717+K10760+K13493+K13495+K13496+K23452
Sesquiterpenoid and triterpenoid biosynthesis	ko00909	LOC110732064;LOC110682470;LOC110719994;LOC110685768;LOC110718885;LOC110718886;LOC110718883;LOC110705161;LOC110705162;LOC110705164;LOC110705167;LOC110731960;LOC110687266;LOC110693457;LOC110731934;LOC110687149;LOC110683243;LOC110725102;LOC110694380;LOC110687146;LOC110687147;LOC110699990;LOC110695461;LOC110713763;LOC110735803;LOC110682840;LOC110682848;LOC110715990;LOC110708917;LOC110694927;LOC110735…	K00511+K00801+K14173+K14175+K15803+K15813+K15891+K20659
Nitrogen metabolism	ko00910	LOC110707529;LOC110704768;LOC110738146;LOC110699581;LOC110696098;LOC110728845;LOC110732751;LOC110710572;LOC110719248;LOC110735599;LOC110730635;LOC110696990;novel.6365;novel.10899;novel.10902;novel.11845;novel.4718;LOC110710062;LOC110720167;LOC110693275;LOC110698587;LOC110718645;LOC110681612;LOC110717064;LOC110682416;LOC110708703;LOC110740087;LOC110738050;LOC110707944;LOC110694162;LOC110725639;LOC…	K00261+K00262+K00264+K00284+K00366+K00459+K01455+K01673+K01674+K01725+K01915+K02575+K10534
Sulfur metabolism	ko00920	LOC110718502;LOC110739011;LOC110695082;LOC110681920;LOC110696042;LOC110736228;LOC110706962;LOC110705939;LOC110694596;LOC110702951;LOC110686795;LOC110696275;LOC110698416;LOC110730010;LOC110684448;LOC110732225;LOC110690463;LOC110707528;LOC110717073;LOC110704769;LOC110682434;novel.9538;LOC110703446;LOC110687763;LOC110722399;LOC110690297;LOC110693230;LOC110693513;LOC110687208;LOC110706828;LOC11069355…	K00380+K00387+K00392+K00640+K00641+K00860+K00988+K01011+K01082+K01738+K01739+K02045+K05907+K13034+K13811+K15422+K17285+K17725+K22966
Phenylpropanoid biosynthesis	ko00940	LOC110716510;LOC110735772;LOC110735775;LOC110735199;LOC110721692;LOC110735565;LOC110682049;LOC110725801;LOC110725482;LOC110725483;LOC110695210;LOC110718807;novel.2494;novel.2495;novel.2610;novel.4433;novel.4434;LOC110720125;LOC110693118;LOC110693119;LOC110730835;LOC110690809;LOC110690806;LOC110737650;LOC110711918;LOC110701166;LOC110697446;LOC110697444;LOC110697445;LOC110720235;LOC110720233;LOC110…	K00083+K00430+K00487+K00588+K01188+K01904+K05349+K05350+K06892+K09753+K09754+K09755+K10775+K11188+K12355+K12356+K13065+K13066+K18368+K22395+K23260
Flavonoid biosynthesis	ko00941	LOC110733489;LOC110724781;LOC110686440;LOC110686439;LOC110733463;LOC110694697;LOC110733452;novel.6146;LOC110684642;LOC110684225;LOC110710327;LOC110683790;LOC110716920;LOC110717594;LOC110739647;LOC110710877;LOC110716610;LOC110716973;LOC110716716;LOC110716799;LOC110703828;LOC110739606;LOC110688844;LOC110716571;LOC110718739;LOC110712374;LOC110712373;LOC110739844;LOC110682322;LOC110682328;LOC11071088…	K00475+K00487+K00588+K00660+K01859+K05277+K05278+K05280+K08243+K08695+K09754+K13065+K13081+K13082+K13083+K22845
Anthocyanin biosynthesis	ko00942	LOC110713003;LOC110725973;LOC110692997;LOC110692996;LOC110693002;LOC110693001;novel.6352;LOC110713821;LOC110698086;LOC110698085;LOC110713630;LOC110737715;LOC110686952;LOC110698200;LOC110713841;novel.8433	K12930+K17193
Isoflavonoid biosynthesis	ko00943	LOC110705200;LOC110684734;LOC110724551;LOC110698935;LOC110685266;LOC110698877;LOC110693234;LOC110705190;LOC110733598;LOC110697190;LOC110697421;LOC110719692;LOC110693386;LOC110733572;LOC110691245;LOC110704965;LOC110728185;LOC110728345;LOC110692361;LOC110721963;LOC110704902;LOC110704903;LOC110700173;LOC110738043;novel.6278;LOC110691363;LOC110706881;LOC110731138;LOC110693591;LOC110691636;LOC11073413…	K13258+K13260+K13264+K25075
Flavone and flavonol biosynthesis	ko00944	LOC110700687;LOC110726355;novel.7540;LOC110705665;LOC110702489;LOC110695652;LOC110716731;LOC110706198;LOC110709105;LOC110705758;LOC110689924;LOC110729246;LOC110734751;LOC110729297;LOC110706464;LOC110713237;LOC110709974;LOC110691748;LOC110684845;LOC110696557;LOC110712449;LOC110708231;LOC110687785;LOC110711941;LOC110691413;LOC110703425;LOC110708979;novel.8967;LOC110719166;LOC110702273;LOC110723580;…	K05280+K13083+K13264+K22772+K22794
Stilbenoid, diarylheptanoid and gingerol biosynthesis	ko00945	LOC110684642;LOC110684225;LOC110710327;LOC110683790;LOC110716920;LOC110717594;LOC110739647;LOC110710877;LOC110716610;LOC110716973;LOC110716716;LOC110716799;LOC110703828;LOC110739606;LOC110688844;LOC110716571;LOC110718739;LOC110712374;LOC110712373;LOC110739844;LOC110682322;LOC110682328;LOC110710887;LOC110701836;LOC110714951;LOC110711729;LOC110714717;LOC110720052;LOC110695567;LOC110688779;LOC110709…	K00487+K00588+K09754+K13065+K16040+K17212
Isoquinoline alkaloid biosynthesis	ko00950	LOC110727457;LOC110699680;LOC110694706;LOC110712357;LOC110724736;LOC110709299;LOC110696815;LOC110713448;LOC110737814;LOC110709286;LOC110692771;LOC110732717;LOC110713596;LOC110700850;LOC110684851;LOC110712386;novel.7308;novel.1920;LOC110731398;LOC110687186;LOC110731171;LOC110706721;LOC110693764;LOC110725420;LOC110706860;LOC110693575;LOC110733645;LOC110705751;LOC110689450;LOC110710831;LOC110686958;…	K00276+K00307+K00422+K00811+K00815+K01593+K01742+K13384+K14454+K14455+K14975+K15849+K22097
Tropane, piperidine and pyridine alkaloid biosynthesis	ko00960	LOC110727457;LOC110699680;LOC110694706;LOC110712357;LOC110724736;LOC110709299;LOC110696815;LOC110713448;LOC110737814;LOC110709286;LOC110692771;LOC110732717;LOC110713596;LOC110700850;LOC110684851;LOC110712386;novel.7308;novel.1920;LOC110733645;LOC110705751;LOC110689450;LOC110710831;LOC110686958;LOC110709357;LOC110722546;LOC110683880;LOC110720298;LOC110685206;LOC110706509;LOC110697332;LOC110687661;…	K00276+K00811+K00815+K00817+K08081+K14454+K14455+K15849+K18606
Betalain biosynthesis	ko00965	LOC110699446;LOC110697752;LOC110688605;LOC110693700;LOC110711866;LOC110728031;LOC110733687;LOC110689692;LOC110687643;novel.11000;novel.11002;LOC110685802;LOC110723762;LOC110689047;LOC110736695;LOC110736697;LOC110736693;LOC110712522;LOC110726453;LOC110733548;LOC110733546;LOC110733386;LOC110706667;LOC110699383;LOC110699386;LOC110717138;LOC110688975;LOC110730384;LOC110692675;LOC110682495;LOC11069037…	K01593+K15777
Glucosinolate biosynthesis	ko00966	LOC110686173;LOC110692325;LOC110692373;LOC110692375;LOC110691105;LOC110719991;LOC110722530;LOC110732056;LOC110690904;LOC110690905;LOC110737871;LOC110694082;LOC110696885;LOC110696884;LOC110698965;LOC110724692;LOC110724693;LOC110724690;LOC110723664;LOC110709841;LOC110724534;LOC110698891;LOC110723603;LOC110703088;LOC110709839;LOC110724685;LOC110724684;LOC110724687;LOC110724686;LOC110724689;LOC110723…	K00826+K01703+K11818+K11820
Aminoacyl-tRNA biosynthesis	ko00970	LOC110694892;LOC110707292;LOC110706371;LOC110734952;LOC110724714;LOC110703472;LOC110695750;LOC110682138;LOC110729319;LOC110712279;LOC110709869;LOC110690715;LOC110732637;LOC110708768;LOC110720668;LOC110685622;LOC110726157;LOC110697615;LOC110705479;LOC110727144;LOC110731542;LOC110730094;LOC110716758;LOC110737036;LOC110702098;LOC110716259;LOC110697956;LOC110708495;LOC110699240;LOC110709447;LOC110739…	K00604+K01866+K01867+K01868+K01869+K01870+K01872+K01873+K01874+K01875+K01876+K01880+K01881+K01883+K01885+K01886+K01887+K01889+K01890+K01892+K01893+K02433+K02434+K02435+K04567+K14164+K22503
Biosynthesis of various secondary metabolites - part 2	ko00998	LOC110692822;LOC110732670	K21568
Biosynthesis of unsaturated fatty acids	ko01040	LOC110689989;LOC110732363;LOC110682188;LOC110718230;LOC110710870;LOC110722825;LOC110733915;novel.8772;novel.8773;LOC110731525;LOC110714088;LOC110736380;LOC110738723;LOC110738722;LOC110738720;LOC110738725;LOC110701050;LOC110718145;LOC110717855;LOC110683338;LOC110738719;LOC110717329;LOC110687912;LOC110726766;LOC110700023;LOC110702762;LOC110731869;LOC110731917;LOC110702721;LOC110703296;LOC110728089;…	K00232+K01068+K03921+K07513+K10246+K10251+K10256+K10258+K10703
Metabolic pathways	ko01100	LOC110733184;LOC110735383;LOC110717704;LOC110689345;LOC110725809;LOC110738731;LOC110717695;LOC110698203;LOC110698202;LOC110733825;LOC110733826;LOC110730407;LOC110719370;LOC110698365;LOC110702595;novel.402;novel.403;LOC110683503;LOC110688224;LOC110703834;LOC110703830;LOC110697125;LOC110710556;LOC110729727;LOC110739658;LOC110739659;LOC110712843;LOC110722815;LOC110732354;LOC110726369;LOC110700674;LO…	K00001+K00002+K00003+K00008+K00010+K00012+K00013+K00016+K00020+K00021+K00025+K00026+K00028+K00029+K00030+K00031+K00033+K00036+K00051+K00052+K00053+K00058+K00059+K00074+K00078+K00079+K00083+K00088+K00099+K00102+K00103+K00106+K00108+K00109+K00121+K00122+K00128+K00130+K00131+K00133+K00134+K00140+K00145+K00161+K00162+K00164+K00166+K00167+K00207+K00208+K00213+K00215+K00218+K00222+K00225+K00227+K00228+…
Biosynthesis of secondary metabolites	ko01110	LOC110733184;LOC110735383;LOC110717704;LOC110689345;LOC110725809;LOC110738731;LOC110717695;LOC110698203;LOC110698202;LOC110733825;LOC110733826;LOC110730407;LOC110719370;LOC110698365;LOC110702595;novel.402;novel.403;LOC110683503;LOC110688224;LOC110716326;LOC110704400;LOC110706017;LOC110683250;LOC110718097;LOC110709482;LOC110700587;LOC110716616;LOC110691559;LOC110682679;LOC110707339;LOC110704449;LO…	K00001+K00002+K00003+K00006+K00010+K00013+K00016+K00021+K00025+K00026+K00030+K00031+K00033+K00036+K00052+K00053+K00058+K00059+K00083+K00088+K00099+K00106+K00111+K00121+K00128+K00133+K00134+K00145+K00161+K00162+K00164+K00166+K00167+K00208+K00213+K00215+K00218+K00222+K00224+K00225+K00227+K00228+K00231+K00232+K00234+K00235+K00236+K00249+K00264+K00276+K00281+K00286+K00307+K00318+K00382+K00422+K00430+…
Carbon metabolism	ko01200	LOC110703738;LOC110707421;LOC110714132;LOC110721337;LOC110689431;LOC110718311;LOC110686902;LOC110686158;LOC110722334;LOC110689818;LOC110685538;LOC110728589;LOC110712575;LOC110726448;LOC110700602;LOC110737759;LOC110731508;LOC110721588;LOC110692501;LOC110713881;LOC110720454;LOC110725120;LOC110685325;LOC110685327;LOC110739388;LOC110709067;LOC110715612;LOC110696653;LOC110715103;LOC110690277;LOC110707…	K00025+K00026+K00028+K00029+K00030+K00031+K00033+K00036+K00051+K00058+K00074+K00121+K00122+K00131+K00134+K00140+K00161+K00162+K00164+K00232+K00234+K00235+K00236+K00261+K00281+K00297+K00382+K00600+K00605+K00615+K00616+K00626+K00627+K00640+K00658+K00814+K00830+K00831+K00844+K00850+K00851+K00855+K00863+K00873+K00927+K00948+K01006+K01057+K01070+K01079+K01100+K01455+K01595+K01601+K01602+K01610+K01623+…
2-Oxocarboxylic acid metabolism	ko01210	LOC110707141;LOC110724961;LOC110721213;LOC110721189;LOC110687528;LOC110727239;LOC110690841;LOC110740099;LOC110740096;LOC110738453;LOC110722505;LOC110720542;LOC110697688;LOC110734160;novel.2507;novel.4326;LOC110709946;LOC110738987;LOC110730344;LOC110682185;LOC110724429;LOC110699928;LOC110718165;LOC110735157;LOC110704601;LOC110689308;LOC110704941;LOC110698604;LOC110712629;LOC110739539;LOC110725888;…	K00030+K00031+K00052+K00053+K00133+K00145+K00620+K00811+K00814+K00818+K00826+K00928+K00930+K01438+K01647+K01649+K01652+K01653+K01681+K01687+K01703+K01704+K11818+K11820+K14272+K14454+K14455+K14677+K14682
Fatty acid metabolism	ko01212	LOC110736931;LOC110736056;LOC110710448;LOC110708609;LOC110716052;LOC110710455;LOC110716101;LOC110725927;LOC110725925;LOC110716066;LOC110711529;LOC110712407;LOC110712365;LOC110707335;LOC110684731;LOC110708610;LOC110707436;LOC110707540;LOC110707542;LOC110707435;LOC110724230;LOC110702855;novel.5805;novel.7097;novel.10699;LOC110686509;LOC110739780;LOC110724264;LOC110689989;LOC110732363;LOC110682188;L…	K00059+K00208+K00232+K00249+K00626+K00645+K00648+K01074+K01692+K01897+K01961+K01962+K01963+K02160+K02372+K03921+K07512+K07513+K09458+K10246+K10251+K10256+K10258+K10527+K10703+K10781+K11262+K18660
Biosynthesis of amino acids	ko01230	LOC110683503;LOC110688224;LOC110736158;LOC110695974;LOC110707141;LOC110724961;LOC110721213;LOC110721189;LOC110687528;LOC110727239;LOC110690841;LOC110740099;LOC110740096;LOC110738453;LOC110722505;LOC110720542;LOC110697688;LOC110734160;novel.2507;novel.4326;LOC110709946;LOC110738987;LOC110730344;LOC110682185;LOC110724429;LOC110699928;LOC110718165;LOC110735157;LOC110704601;LOC110689308;LOC110704941;…	K00003+K00013+K00030+K00031+K00052+K00053+K00058+K00133+K00134+K00145+K00215+K00264+K00286+K00549+K00600+K00611+K00615+K00616+K00620+K00640+K00641+K00765+K00766+K00789+K00800+K00811+K00814+K00817+K00818+K00826+K00831+K00850+K00872+K00873+K00891+K00927+K00928+K00930+K00948+K01079+K01438+K01476+K01586+K01609+K01620+K01623+K01626+K01647+K01649+K01652+K01653+K01657+K01658+K01663+K01681+K01687+K01689+…
Biosynthesis of cofactors	ko01240	LOC110735383;LOC110717704;LOC110689345;LOC110725809;LOC110738731;LOC110717695;LOC110698203;LOC110698202;LOC110733825;LOC110733826;LOC110730407;LOC110719370;LOC110698365;LOC110702595;novel.402;novel.403;LOC110726369;LOC110700674;LOC110724483;LOC110724482;LOC110712121;LOC110711971;LOC110686899;LOC110686138;LOC110724593;LOC110711965;LOC110722102;LOC110737278;LOC110735086;LOC110711994;LOC110717323;no…	K00002+K00012+K00059+K00103+K00128+K00208+K00225+K00228+K00231+K00254+K00275+K00278+K00288+K00382+K00457+K00591+K00600+K00606+K00609+K00652+K00763+K00767+K00789+K00793+K00794+K00826+K00831+K00858+K00859+K00861+K00868+K00873+K00878+K00939+K00940+K00949+K00953+K00963+K00966+K01012+K01113+K01307+K01465+K01495+K01598+K01599+K01633+K01661+K01698+K01719+K01749+K01756+K01772+K01809+K01845+K01885+K01918+…
ABC transporters	ko02010	LOC110695141;LOC110700898;LOC110707297;LOC110711863;LOC110726489;LOC110700557;LOC110700558;LOC110726573;LOC110726572;LOC110695405;LOC110726490;LOC110712126;LOC110700561;LOC110711946;LOC110691516;LOC110695413;LOC110695412;novel.2046;LOC110709334;LOC110726308;LOC110722212;LOC110712377;LOC110729719;LOC110697119;LOC110730158;LOC110728813;LOC110729859;LOC110711136;LOC110704346;LOC110729756;LOC11069492…	K02045+K05643+K05656+K05657+K05658+K05662+K05665+K05666+K05674+K05677+K05681+K08711
Ribosome biogenesis in eukaryotes	ko03008	LOC110733017;LOC110734271;LOC110702748;LOC110723137;LOC110707123;LOC110704518;LOC110707278;LOC110682418;LOC110693278;LOC110717058;LOC110691498;LOC110717082;LOC110693315;LOC110691653;LOC110691652;LOC110682405;LOC110694637;LOC110721561;LOC110720480;LOC110706211;LOC110730271;LOC110732440;LOC110727962;LOC110689769;LOC110721950;LOC110705290;LOC110700167;LOC110727281;LOC110692948;LOC110717237;LOC110688…	K01164+K03097+K03115+K03264+K03537+K03538+K03539+K06943+K07178+K07179+K07562+K07936+K11108+K11128+K11129+K11130+K11131+K11883+K12619+K12845+K13288+K14290+K14521+K14525+K14536+K14537+K14538+K14539+K14544+K14545+K14546+K14548+K14549+K14550+K14552+K14553+K14554+K14555+K14556+K14557+K14558+K14559+K14560+K14561+K14563+K14564+K14565+K14566+K14567+K14568+K14569+K14570+K14571+K14572+K14573+K14574+K14575+…
Ribosome	ko03010	LOC110713121;LOC110692145;LOC110702865;LOC110705707;LOC110695142;LOC110690367;LOC110683693;LOC110681976;LOC110706079;LOC110729318;LOC110684244;LOC110725715;LOC110695749;LOC110684622;LOC110721614;LOC110698116;LOC110699053;LOC110730545;LOC110682156;LOC110717900;LOC110732332;LOC110722794;LOC110731906;LOC110699708;LOC110719123;LOC110731834;LOC110701687;LOC110737273;LOC110697674;LOC110711870;LOC110699…	K02863+K02864+K02865+K02866+K02867+K02868+K02870+K02871+K02872+K02873+K02874+K02875+K02876+K02877+K02878+K02879+K02880+K02881+K02882+K02883+K02884+K02885+K02886+K02887+K02888+K02889+K02890+K02891+K02892+K02893+K02894+K02895+K02896+K02897+K02898+K02899+K02900+K02901+K02902+K02903+K02904+K02905+K02906+K02907+K02908+K02909+K02910+K02911+K02912+K02913+K02914+K02915+K02916+K02917+K02918+K02919+K02920+…
RNA transport	ko03013	LOC110715669;LOC110716334;LOC110691883;LOC110701939;LOC110691884;LOC110729840;LOC110715361;LOC110694267;LOC110723044;LOC110702120;LOC110726498;LOC110729836;LOC110681789;LOC110700547;LOC110712207;novel.8266;novel.9579;LOC110694689;LOC110724849;LOC110711744;LOC110714086;LOC110733017;LOC110734271;LOC110710133;LOC110683813;novel.4120;LOC110721029;LOC110723751;LOC110720955;LOC110723843;LOC110722619;LO…	K00784+K00974+K01164+K02516+K03113+K03231+K03236+K03237+K03238+K03239+K03240+K03241+K03242+K03243+K03245+K03246+K03247+K03248+K03249+K03250+K03251+K03252+K03253+K03254+K03257+K03259+K03260+K03262+K03537+K03538+K03539+K03680+K03754+K05019+K05749+K07562+K07936+K09291+K10577+K12812+K12875+K12876+K12877+K12878+K12879+K12880+K12881+K12882+K12883+K13025+K13098+K13114+K13126+K13130+K13137+K13151+K13171+…
mRNA surveillance pathway	ko03015	LOC110703941;LOC110693164;LOC110739668;LOC110716632;LOC110684348;LOC110716942;LOC110708200;LOC110700506;LOC110709376;LOC110726534;LOC110725676;LOC110739141;LOC110724217;LOC110691244;LOC110702880;LOC110719684;novel.5563;novel.5564;novel.5978;novel.6359;novel.9559;LOC110739521;LOC110734806;LOC110724396;LOC110738145;LOC110685627;LOC110727380;LOC110715477;LOC110699582;LOC110705462;LOC110739509;LOC110…	K00565+K03265+K03267+K03456+K04354+K04382+K06100+K06269+K06965+K08873+K11583+K11584+K12812+K12875+K12876+K12877+K12881+K12882+K12883+K13025+K13098+K13114+K13126+K13171+K13917+K14294+K14324+K14325+K14326+K14327+K14328+K14376+K14396+K14397+K14398+K14399+K14400+K14401+K14402+K14403+K14404+K14405+K14406+K14407+K14408+K14409+K14411+K14416+K14962+K15542+K15544+K18655+K18723
RNA degradation	ko03018	LOC110706655;LOC110692319;LOC110730405;LOC110723769;LOC110719108;LOC110702469;LOC110692240;LOC110713332;LOC110729238;LOC110683635;LOC110733270;LOC110690897;LOC110736626;LOC110719827;LOC110715485;LOC110719272;LOC110740237;LOC110705518;LOC110718592;LOC110733910;LOC110727835;LOC110684291;LOC110729895;LOC110692674;LOC110740175;LOC110709724;LOC110706292;LOC110712002;LOC110739911;LOC110729362;LOC110711…	K00850+K00962+K01148+K01689+K03514+K03654+K03678+K03679+K03681+K04043+K04077+K07573+K08311+K10643+K11600+K12580+K12581+K12585+K12586+K12587+K12589+K12590+K12591+K12592+K12593+K12598+K12599+K12600+K12602+K12603+K12604+K12605+K12606+K12607+K12608+K12611+K12613+K12614+K12616+K12617+K12619+K12620+K12621+K12622+K12623+K12624+K12625+K12626+K12627+K13126+K14442+K18681
RNA polymerase	ko03020	LOC110704662;LOC110690286;novel.5580;novel.5581;novel.5582;novel.5583;novel.11877;LOC110720576;LOC110721129;LOC110730812;LOC110691819;LOC110710932;LOC110688704;LOC110712459;LOC110690030;LOC110684352;LOC110708447;LOC110688120;LOC110708876;LOC110737075;LOC110716887;LOC110739023;LOC110695459;LOC110716851;LOC110688773;LOC110700891;LOC110724067;LOC110713826;LOC110718918;LOC110685579;LOC110693292;LOC11…	K02999+K03000+K03002+K03004+K03005+K03006+K03007+K03008+K03009+K03010+K03011+K03012+K03013+K03014+K03015+K03016+K03017+K03018+K03019+K03020+K03021+K03022+K03023+K03024+K03025+K03026+K03027+K03040+K03043+K03046+K14721
Basal transcription factors	ko03022	LOC110694476;LOC110690993;LOC110707758;LOC110702967;LOC110698555;LOC110715034;LOC110736580;LOC110704995;LOC110683502;LOC110688226;LOC110712576;LOC110700330;LOC110727581;LOC110694655;LOC110740039;LOC110685103;LOC110687218;LOC110702948;LOC110693501;LOC110683357;LOC110688362;LOC110706928;LOC110693635;LOC110688744;LOC110707311;LOC110691528;LOC110686182;LOC110736252;LOC110722607;LOC110717174;LOC110717…	K02202+K03120+K03122+K03123+K03124+K03125+K03126+K03127+K03128+K03129+K03130+K03131+K03132+K03133+K03134+K03135+K03136+K03137+K03138+K03139+K03141+K03142+K03143+K03144+K06634+K10842+K10843+K10844+K10845+K14649
DNA replication	ko03030	LOC110727260;LOC110708091;LOC110710830;LOC110683313;LOC110738569;LOC110738261;novel.7987;LOC110733051;LOC110734304;LOC110705144;LOC110718908;LOC110716134;LOC110682319;LOC110718213;LOC110698360;novel.6117;LOC110710439;LOC110712536;LOC110684277;LOC110689631;LOC110734028;LOC110720800;LOC110693007;LOC110717949;LOC110684239;LOC110684627;LOC110736603;LOC110708346;LOC110721689;LOC110701270;LOC110704568;…	K02209+K02210+K02212+K02320+K02321+K02324+K02325+K02326+K02327+K02328+K02335+K02540+K02541+K02542+K02684+K02685+K03111+K03504+K03505+K04799+K04802+K07466+K10739+K10740+K10742+K10743+K10744+K10745+K10747+K10754+K10755+K10756
Spliceosome	ko03040	LOC110707145;LOC110735406;LOC110713745;LOC110713740;LOC110739025;LOC110695309;LOC110701830;LOC110734886;LOC110689519;LOC110685711;LOC110714473;LOC110718961;LOC110720941;LOC110735579;LOC110731041;LOC110699567;LOC110696419;LOC110734565;LOC110683124;LOC110701468;LOC110730268;LOC110724931;LOC110731676;LOC110719218;LOC110721185;LOC110735191;LOC110683861;LOC110725412;LOC110725410;LOC110731294;LOC110715…	K03283+K06063+K09564+K09567+K10599+K11086+K11087+K11088+K11091+K11092+K11093+K11094+K11095+K11096+K11097+K11098+K11099+K11984+K12621+K12622+K12623+K12624+K12625+K12626+K12627+K12662+K12733+K12741+K12811+K12812+K12813+K12815+K12816+K12817+K12818+K12819+K12820+K12821+K12822+K12823+K12824+K12825+K12826+K12827+K12828+K12829+K12830+K12831+K12832+K12833+K12834+K12835+K12836+K12837+K12839+K12840+K12842+…
Proteasome	ko03050	LOC110711972;LOC110711253;LOC110700930;LOC110683712;LOC110710362;LOC110686388;LOC110696055;LOC110691139;LOC110688990;LOC110735039;LOC110733561;LOC110704866;LOC110703907;LOC110683994;LOC110689359;LOC110719803;LOC110717734;LOC110685501;LOC110721792;LOC110715735;LOC110719768;LOC110694725;LOC110724570;LOC110721423;LOC110714190;novel.10167;novel.2563;LOC110738970;LOC110735183;LOC110713351;LOC110713353…	K02725+K02726+K02727+K02728+K02729+K02730+K02731+K02732+K02734+K02735+K02736+K02737+K02738+K02739+K03028+K03029+K03030+K03031+K03032+K03033+K03035+K03036+K03037+K03038+K03039+K03061+K03062+K03063+K03064+K03065+K03066+K06691+K06693+K06699+K06700+K10881+K11599
Protein export	ko03060	LOC110734809;LOC110691280;LOC110716413;LOC110687302;LOC110724039;LOC110733187;LOC110686640;LOC110737325;LOC110696301;LOC110684763;LOC110694898;LOC110709350;LOC110712997;LOC110685714;LOC110716081;LOC110683041;LOC110695383;LOC110735883;LOC110688871;LOC110694815;LOC110695798;LOC110695858;LOC110719107;LOC110699769;LOC110695467;LOC110711304;LOC110721105;LOC110713472;LOC110701656;LOC110692638;LOC110698…	K03070+K03100+K03104+K03105+K03106+K03107+K03108+K03109+K03110+K03116+K03118+K03217+K07342+K09481+K09490+K09540+K09647+K09648+K10956+K12272+K12275+K12946+K12947+K12948+K13280+K13431
Base excision repair	ko03410	LOC110699169;LOC110710575;LOC110726828;LOC110691580;LOC110707130;LOC110707364;LOC110707366;novel.10787;LOC110721297;LOC110739967;LOC110722413;LOC110684975;LOC110686063;LOC110696638;LOC110711297;LOC110684277;LOC110689631;LOC110734028;LOC110720800;LOC110693007;LOC110717949;LOC110684239;LOC110684627;LOC110736603;LOC110708346;LOC110721689;LOC110701270;LOC110704568;LOC110734515;LOC110689238;LOC1107252…	K01142+K01246+K01247+K02324+K02325+K02326+K02327+K02328+K02335+K03504+K03505+K03512+K03575+K03648+K03652+K03660+K04799+K04802+K10563+K10569+K10747+K10771+K10772+K10773+K10798+K10801+K10803+K24070
Nucleotide excision repair	ko03420	LOC110694476;LOC110690993;LOC110707758;LOC110702967;LOC110684277;LOC110689631;LOC110734028;LOC110720800;LOC110693007;LOC110717949;LOC110684239;LOC110684627;LOC110736603;LOC110708346;LOC110721689;LOC110701270;LOC110704568;LOC110734515;LOC110689238;LOC110725270;LOC110714283;LOC110718266;LOC110711789;LOC110720027;LOC110733321;LOC110710627;LOC110738748;LOC110702000;LOC110691950;LOC110731964;LOC110711…	K02202+K02324+K02325+K02326+K02327+K02328+K02335+K03141+K03142+K03143+K03144+K03504+K03505+K03657+K03868+K04802+K06634+K07466+K10140+K10570+K10609+K10610+K10739+K10740+K10747+K10754+K10755+K10756+K10838+K10839+K10841+K10842+K10843+K10844+K10845+K10846+K10848+K10849
Mismatch repair	ko03430	LOC110736603;LOC110708346;LOC110721689;LOC110701270;LOC110704568;LOC110734515;LOC110689238;LOC110726103;LOC110698352;LOC110708723;LOC110734031;LOC110737818;LOC110736344;LOC110701015;LOC110716254;LOC110710078;LOC110724155;LOC110688331;LOC110683395;LOC110733389;LOC110699219;LOC110693112;LOC110734645;LOC110685912;LOC110706897;LOC110692947;LOC110693074;LOC110735697;LOC110727298;LOC110693606;LOC110689…	K02327+K02328+K03111+K03504+K03505+K03657+K04802+K07456+K07466+K08734+K08735+K08736+K08737+K08739+K10739+K10740+K10746+K10747+K10754+K10755+K10756+K10858
Homologous recombination	ko03440	LOC110736603;LOC110708346;LOC110721689;LOC110701270;LOC110704568;LOC110734515;LOC110689238;LOC110725270;LOC110714283;LOC110718266;LOC110711789;LOC110720027;LOC110733321;LOC110710627;LOC110738748;LOC110726103;LOC110698352;LOC110708723;LOC110697911;LOC110736615;LOC110714734;LOC110702005;LOC110701284;LOC110697764;LOC110711530;LOC110709097;LOC110691155;LOC110692075;LOC110699204;LOC110734031;LOC110737…	K02327+K02328+K02335+K03111+K03165+K03504+K03505+K03553+K03655+K04482+K04728+K07466+K08775+K08991+K10683+K10728+K10739+K10740+K10865+K10866+K10867+K10869+K10870+K10871+K10875+K10879+K10880+K10881+K10882+K10901+K11864+K12173+K15362+K20776
Non-homologous end-joining	ko03450	LOC110713045;LOC110713687;LOC110681967;LOC110695130;LOC110736277;LOC110717162;LOC110693192;LOC110723682;LOC110711810;LOC110715007;LOC110695304;LOC110682135;novel.8031;LOC110721419;LOC110714066;LOC110718163;LOC110689323;LOC110716200	K03512+K04799+K10777+K10865+K10866+K10884+K10885+K10886
MAPK signaling pathway - plant	ko04016	LOC110720496;LOC110727451;LOC110687903;LOC110722512;LOC110726803;LOC110721544;LOC110721543;LOC110692930;LOC110719686;LOC110736245;LOC110711567;LOC110719881;LOC110740328;LOC110687322;LOC110692654;LOC110710396;LOC110720050;LOC110711868;LOC110739068;LOC110708426;LOC110738216;LOC110723965;LOC110688978;LOC110715002;LOC110696054;LOC110730381;LOC110730380;LOC110730382;LOC110714480;LOC110697297;LOC110731…	K00940+K02183+K03781+K13413+K13414+K13416+K13420+K13422+K13424+K13425+K13426+K13447+K13449+K14496+K14497+K14498+K14509+K14510+K14512+K14513+K14514+K14515+K14516+K16224+K17686+K20535+K20536+K20537+K20538+K20547+K20551+K20553+K20557+K20558+K20600+K20603+K20604+K20606+K20607+K20714+K20716+K20717+K20718+K20725+K20726+K20728+K20729+K20772
Phosphatidylinositol signaling system	ko04070	LOC110728708;LOC110736831;LOC110698493;LOC110705057;novel.6790;LOC110685657;LOC110695655;LOC110714441;LOC110686324;LOC110715467;LOC110686123;LOC110702008;LOC110692038;LOC110738382;LOC110686318;LOC110703763;LOC110697003;LOC110696839;LOC110711545;LOC110731488;LOC110683710;LOC110710403;LOC110714353;LOC110697098;LOC110708297;LOC110704757;LOC110687952;LOC110686206;LOC110687886;LOC110710626;LOC11070615…	K00888+K00889+K00901+K00913+K00914+K00915+K00921+K00981+K00999+K01092+K01099+K01106+K01110+K02183+K05857+K10047+K10572+K13024+K13711+K15422+K18081+K18649+K19801+K21797
Plant hormone signal transduction	ko04075	LOC110700658;LOC110716621;LOC110681689;LOC110703398;LOC110685600;LOC110724362;LOC110724364;LOC110730656;LOC110701254;LOC110728951;LOC110705762;LOC110720277;LOC110690045;LOC110718216;LOC110692100;LOC110695361;LOC110701641;LOC110726386;LOC110730655;LOC110715113;LOC110717720;LOC110716936;LOC110736579;LOC110688662;LOC110682321;LOC110734422;LOC110692226;LOC110721486;LOC110686233;LOC110713126;LOC110717…	K12126+K13413+K13415+K13416+K13422+K13449+K13463+K13464+K13946+K14431+K14432+K14484+K14485+K14486+K14487+K14488+K14489+K14490+K14491+K14492+K14493+K14494+K14495+K14496+K14497+K14498+K14499+K14500+K14502+K14503+K14504+K14505+K14506+K14508+K14509+K14510+K14512+K14513+K14514+K14515+K14516+K16189
Ubiquitin mediated proteolysis	ko04120	LOC110693626;LOC110729709;LOC110729690;LOC110738873;LOC110738879;LOC110728100;LOC110721999;LOC110730987;LOC110730986;LOC110699220;LOC110733391;LOC110734224;LOC110696482;LOC110699662;LOC110731830;LOC110704200;LOC110729496;LOC110703583;LOC110703585;LOC110703584;LOC110703586;LOC110735196;LOC110735194;LOC110735193;LOC110697353;LOC110695293;LOC110734861;LOC110734862;LOC110737347;LOC110727767;LOC110681…	K02927+K02977+K03094+K03178+K03347+K03348+K03349+K03350+K03351+K03352+K03353+K03354+K03355+K03357+K03358+K03363+K03364+K03868+K03869+K03872+K03873+K03875+K04506+K04554+K04649+K04706+K06688+K06689+K08770+K09561+K10140+K10143+K10144+K10260+K10570+K10571+K10573+K10575+K10576+K10577+K10578+K10579+K10580+K10581+K10583+K10588+K10589+K10590+K10591+K10592+K10597+K10598+K10599+K10601+K10609+K10610+K10614+…
Sulfur relay system	ko04122	LOC110722399;LOC110690297;LOC110736333;LOC110701007;LOC110714500;novel.2544;LOC110709959;LOC110697825;LOC110686161;LOC110722424;LOC110723891;LOC110720918;LOC110701572;LOC110736308;LOC110714035;LOC110685372;LOC110703658;LOC110721630;LOC110691506;LOC110707286;LOC110715830;LOC110721863	K01011+K03635+K03637+K03639+K04487+K11996+K12161+K14168+K14169+K21232
SNARE interactions in vesicular transport	ko04130	LOC110685155;LOC110736525;LOC110733830;LOC110734244;LOC110734246;LOC110682504;LOC110732996;LOC110688835;LOC110701197;LOC110696508;LOC110728061;LOC110735390;LOC110733829;LOC110738881;LOC110733993;LOC110687082;LOC110682785;LOC110683197;LOC110735392;LOC110687382;novel.8236;novel.12052;LOC110702397;LOC110717378;LOC110687033;LOC110687049;LOC110693032;LOC110702674;LOC110730135;LOC110732588;LOC110727958…	K08486+K08488+K08489+K08490+K08492+K08493+K08495+K08496+K08497+K08500+K08503+K08504+K08505+K08506+K08507+K08515+K08516+K08517
Autophagy - other	ko04136	LOC110694176;LOC110708791;LOC110736107;LOC110713063;LOC110695728;LOC110695913;LOC110713846;LOC110696711;LOC110719051;LOC110685010;LOC110739920;LOC110700007;LOC110713541;LOC110698413;LOC110729187;LOC110710073;LOC110694068;LOC110739360;LOC110739998;LOC110734626;novel.12207;LOC110731168;LOC110690679;LOC110698131;LOC110722911;LOC110730739;LOC110707236;LOC110691453;LOC110682028;LOC110724133;LOC1107045…	K00914+K04382+K07203+K07204+K08266+K08269+K08330+K08331+K08333+K08334+K08336+K08337+K08339+K08341+K08342+K08343+K17606+K17888+K17890+K17906+K17907+K17908+K19730
Protein processing in endoplasmic reticulum	ko04141	LOC110712428;LOC110710782;LOC110729516;LOC110733319;LOC110726734;LOC110717460;LOC110698393;LOC110702367;LOC110739095;LOC110687976;LOC110690756;LOC110737349;LOC110719426;LOC110726574;LOC110722047;LOC110734685;LOC110717617;LOC110712660;LOC110695270;LOC110682102;LOC110708522;LOC110722311;LOC110714962;LOC110714874;LOC110720815;LOC110730849;LOC110708410;LOC110714968;LOC110714966;LOC110714965;LOC110714…	K01228+K01230+K01456+K03094+K03237+K03283+K03347+K03868+K04079+K04374+K04523+K04554+K05546+K06689+K07151+K07342+K07765+K07953+K08054+K08057+K08288+K08653+K08852+K09481+K09486+K09487+K09490+K09503+K09517+K09518+K09523+K09540+K09561+K09562+K09580+K09584+K10084+K10085+K10088+K10575+K10578+K10597+K10601+K10636+K10661+K10666+K10839+K10950+K10956+K11718+K11863+K12275+K12666+K12667+K12668+K12669+K12670+…
Endocytosis	ko04144	LOC110685657;LOC110695655;LOC110714441;LOC110686324;LOC110715467;LOC110686123;LOC110702008;LOC110692038;LOC110738382;LOC110686318;LOC110703763;LOC110697003;LOC110696839;LOC110711545;LOC110731488;LOC110683710;LOC110710403;LOC110714353;LOC110697098;LOC110708297;LOC110704757;LOC110687952;LOC110686206;LOC110687886;LOC110710626;LOC110706154;LOC110696798;LOC110725322;LOC110683224;LOC110726659;LOC110738…	K00889+K01115+K01528+K03283+K04645+K04646+K05754+K05755+K05756+K05757+K05758+K07888+K07889+K07897+K07901+K07904+K07937+K10364+K10365+K10396+K10591+K11824+K11826+K11827+K11866+K12182+K12183+K12184+K12185+K12188+K12189+K12190+K12191+K12192+K12193+K12194+K12195+K12196+K12197+K12198+K12199+K12200+K12471+K12472+K12479+K12483+K12486+K12489+K12492+K12493+K15053+K17260+K17917+K18442+K18443+K18466+K18467+…
Phagosome	ko04145	LOC110694176;LOC110708791;LOC110715745;LOC110694445;LOC110727061;LOC110709236;LOC110710952;LOC110688025;LOC110712595;LOC110715979;LOC110689158;LOC110735187;LOC110714014;LOC110721846;LOC110694742;LOC110726708;LOC110714455;LOC110721702;LOC110725296;LOC110725298;novel.9529;novel.2659;novel.4926;LOC110697657;LOC110730638;LOC110724326;LOC110730473;LOC110730472;LOC110701047;LOC110736379;LOC110699516;LO…	K00914+K00921+K01365+K02144+K02145+K02146+K02147+K02148+K02149+K02150+K02151+K02152+K02153+K02154+K02155+K03661+K04392+K07342+K07374+K07375+K07888+K07889+K07897+K08054+K08057+K08488+K08492+K08517+K09481+K10956+K12182
Peroxisome	ko04146	LOC110709946;LOC110738987;LOC110730344;LOC110682185;LOC110724429;LOC110699928;LOC110718165;LOC110735157;LOC110704601;LOC110689308;LOC110696016;LOC110696014;LOC110696015;LOC110688703;LOC110736203;novel.7980;LOC110689989;LOC110732363;LOC110682188;LOC110718230;LOC110710870;LOC110722825;LOC110733915;novel.8772;novel.8773;LOC110726910;LOC110720833;LOC110701733;LOC110699920;novel.7650;LOC110717163;LOC1…	K00031+K00106+K00232+K00306+K00477+K00830+K00869+K01578+K01640+K01897+K03426+K03781+K04564+K04565+K05677+K06664+K07513+K08726+K11147+K11517+K12261+K12663+K13237+K13335+K13336+K13337+K13338+K13339+K13341+K13342+K13343+K13344+K13345+K13346+K13347+K13348+K13354+K13356+K17879
Plant-pathogen interaction	ko04626	LOC110728535;LOC110698625;LOC110703214;LOC110718912;LOC110724732;LOC110723312;LOC110721068;LOC110692368;LOC110705143;LOC110736245;LOC110711567;LOC110719881;LOC110740328;LOC110687322;LOC110692654;LOC110710396;LOC110720050;LOC110711868;LOC110739068;LOC110708426;LOC110738216;LOC110723965;LOC110688978;LOC110715002;LOC110696054;LOC110730381;LOC110730380;LOC110730382;LOC110714480;LOC110697297;LOC110731…	K00864+K01373+K02183+K02358+K04079+K04368+K05391+K09487+K12795+K13412+K13413+K13414+K13416+K13417+K13420+K13424+K13425+K13426+K13427+K13428+K13429+K13430+K13433+K13434+K13435+K13436+K13437+K13447+K13448+K13449+K13453+K13456+K13457+K13458+K13459+K13466+K13473+K14512+K15397+K16224+K16225+K18834+K18835+K18873+K18875+K18878+K20536+K20600
Circadian rhythm - plant	ko04712	LOC110698032;LOC110702053;LOC110702055;LOC110727184;LOC110727183;LOC110730710;LOC110702057;LOC110713558;LOC110727182;LOC110704577;LOC110723210;LOC110713113;LOC110704372;LOC110714094;LOC110718596;LOC110691988;LOC110714012;LOC110713099;LOC110713686;LOC110721492;LOC110698020;LOC110739866;LOC110690211;LOC110713105;LOC110721471;LOC110730649;LOC110724468;LOC110724462;LOC110724467;LOC110691992;LOC110691…	K00660+K03097+K03115+K10143+K12115+K12116+K12118+K12119+K12120+K12121+K12124+K12125+K12126+K12127+K12129+K12130+K12133+K12135+K16221+K16222+K16223+K16240+K16241

## Sheet: TableS8
Table S8. Differently expressed genes between the groups
Group name	All sig diff	Down regulated	Up regulated
TR1_vs_TS1	5683	2495	3188
CR1_vs_CS1	1000	322	678
TR2_vs_TS2	821	392	429
CR2_vs_CS2	414	225	189
TR1_vs_TR2	3429	1735	1694
TS1_vs_TS2	3129	2081	1048
CR1_vs_CR2	941	550	391
CS1_vs_CS2	2072	1551	521
TR1_vs_CR1	1469	1003	466
TR2_vs_CR2	6227	3230	2997
TS1_vs_CS1	6038	3400	2638
TS2_vs_CS2	5527	3232	2295

## Sheet: TableS9
Table S9. Pathway statistics of significant differences between treatment groups
Groups	Kegg_pathway	Ko_ID	P-value
TR1 VS CR1	Phenylpropanoid biosynthesis	ko00940	0
	Photosynthesis - antenna proteins	ko00196	1.38668e-20
	Metabolic pathways	ko01100	3.95102e-14
	Biosynthesis of secondary metabolites	ko01110	2.11953e-12
	Flavonoid biosynthesis	ko00941	1.70736e-08
	MAPK signaling pathway - plant	ko04016	4.21706e-08
	Glucosinolate biosynthesis	ko00966	1.14567e-05
	Nitrogen metabolism	ko00910	0.000177537
	alpha-Linolenic acid metabolism	ko00592	0.00153328
	Isoflavonoid biosynthesis	ko00943	0.00560453
	Glyoxylate and dicarboxylate metabolism	ko00630	0.0091176
	Starch and sucrose metabolism	ko00500	0.0115
	Plant hormone signal transduction	ko04075	0.0124676
	Indole alkaloid biosynthesis	ko00901	0.0130089
	Stilbenoid, diarylheptanoid and gingerol biosynthesis	ko00945	0.0131138
	Glycerophospholipid metabolism	ko00564	0.017119
	Cyanoamino acid metabolism	ko00460	0.0191857
	Cutin, suberine and wax biosynthesis	ko00073	0.0217891
	Plant-pathogen interaction	ko04626	0.0325602
	2-Oxocarboxylic acid metabolism	ko01210	0.0352875
	Benzoxazinoid biosynthesis	ko00402	0.0362336
	Zeatin biosynthesis	ko00908	0.0408751
	ABC transporters	ko02010	0.0473565
TR2 VS CR2	Photosynthesis - antenna proteins	ko00196	2.00635e-24
	Biosynthesis of secondary metabolites	ko01110	6.51687e-09
	Photosynthesis	ko00195	1.40528e-08
	alpha-Linolenic acid metabolism	ko00592	5.13156e-08
	Metabolic pathways	ko01100	7.79808e-08
	MAPK signaling pathway - plant	ko04016	1.16348e-07
	Plant-pathogen interaction	ko04626	1.27563e-06
	Cutin, suberine and wax biosynthesis	ko00073	0.000119444
	ABC transporters	ko02010	0.000189661
	Glyoxylate and dicarboxylate metabolism	ko00630	0.000250401
	Plant hormone signal transduction	ko04075	0.000259728
	Flavonoid biosynthesis	ko00941	0.000292255
	Phenylpropanoid biosynthesis	ko00940	0.000642717
	Anthocyanin biosynthesis	ko00942	0.00121246
	Carotenoid biosynthesis	ko00906	0.00271879
	Benzoxazinoid biosynthesis	ko00402	0.00297103
	Porphyrin and chlorophyll metabolism	ko00860	0.00491793
	Carbon metabolism	ko01200	0.00717928
	Glycerophospholipid metabolism	ko00564	0.00720049
	Diterpenoid biosynthesis	ko00904	0.00722716
	Taurine and hypotaurine metabolism	ko00430	0.00808889
	Glucosinolate biosynthesis	ko00966	0.00990089
	Zeatin biosynthesis	ko00908	0.0143693
	Tyrosine metabolism	ko00350	0.0151341
	Arachidonic acid metabolism	ko00590	0.0172229
	Nitrogen metabolism	ko00910	0.0233315
	Betalain biosynthesis	ko00965	0.0301746
	Alanine, aspartate and glutamate metabolism	ko00250	0.0315802
	Isoflavonoid biosynthesis	ko00943	0.0332485
TS1 VS CS1	Photosynthesis - antenna proteins	ko00196	2.03187e-24
	Metabolic pathways	ko01100	5.33486e-21
	Biosynthesis of secondary metabolites	ko01110	2.65699e-12
	alpha-Linolenic acid metabolism	ko00592	6.04061e-10
	Nitrogen metabolism	ko00910	1.30947e-07
	Flavonoid biosynthesis	ko00941	9.70107e-07
	Propanoate metabolism	ko00640	1.03245e-06
	Phenylpropanoid biosynthesis	ko00940	1.31945e-06
	Photosynthesis	ko00195	3.33561e-06
	Starch and sucrose metabolism	ko00500	8.80112e-06
	Benzoxazinoid biosynthesis	ko00402	9.70646e-06
	Glyoxylate and dicarboxylate metabolism	ko00630	1.57682e-05
	MAPK signaling pathway - plant	ko04016	2.23448e-05
	Carotenoid biosynthesis	ko00906	2.58314e-05
	Carbon metabolism	ko01200	4.14996e-05
	ABC transporters	ko02010	9.63029e-05
	Glucosinolate biosynthesis	ko00966	0.000290625
	Betalain biosynthesis	ko00965	0.000377407
	Plant hormone signal transduction	ko04075	0.000695013
	Carbon fixation in photosynthetic organisms	ko00710	0.000696982
	Alanine, aspartate and glutamate metabolism	ko00250	0.000975258
	Plant-pathogen interaction	ko04626	0.00101108
	Anthocyanin biosynthesis	ko00942	0.00121567
	Glycerophospholipid metabolism	ko00564	0.00458409
	Butanoate metabolism	ko00650	0.00548679
	Diterpenoid biosynthesis	ko00904	0.00725722
	Taurine and hypotaurine metabolism	ko00430	0.00810407
	Synthesis and degradation of ketone bodies	ko00072	0.00950854
	Brassinosteroid biosynthesis	ko00905	0.012975
	Fatty acid metabolism	ko01212	0.0188259
	Glycosphingolipid biosynthesis - lacto and neolacto series	ko00601	0.0236001
	Cutin, suberine and wax biosynthesis	ko00073	0.0241296
	Pentose phosphate pathway	ko00030	0.0243604
	Zeatin biosynthesis	ko00908	0.0268156
	Glycosaminoglycan degradation	ko00531	0.0278899
	Phosphonate and phosphinate metabolism	ko00440	0.0302988
	Peroxisome	ko04146	0.0321731
	Glycosphingolipid biosynthesis - ganglio series	ko00604	0.0372934
	Arachidonic acid metabolism	ko00590	0.0372934
	Tyrosine metabolism	ko00350	0.0448247
TS2 VS CS2	Biosynthesis of secondary metabolites	ko01110	0
	Photosynthesis - antenna proteins	ko00196	2.91521e-22
	Metabolic pathways	ko01100	9.51975e-14
	MAPK signaling pathway - plant	ko04016	8.99355e-11
	Phenylpropanoid biosynthesis	ko00940	1.6529e-08
	alpha-Linolenic acid metabolism	ko00592	5.82047e-08
	Cutin, suberine and wax biosynthesis	ko00073	8.36896e-08
	Carotenoid biosynthesis	ko00906	1.08878e-06
	Nitrogen metabolism	ko00910	4.62865e-06
	Flavonoid biosynthesis	ko00941	9.4657e-06
	Photosynthesis	ko00195	2.73369e-05
	Plant hormone signal transduction	ko04075	2.91063e-05
	Plant-pathogen interaction	ko04626	7.52962e-05
	Glucosinolate biosynthesis	ko00966	9.27755e-05
	Anthocyanin biosynthesis	ko00942	0.000635524
	Diterpenoid biosynthesis	ko00904	0.000929888
	Starch and sucrose metabolism	ko00500	0.00108681
	Benzoxazinoid biosynthesis	ko00402	0.00125632
	Carbon fixation in photosynthetic organisms	ko00710	0.00149895
	Alanine, aspartate and glutamate metabolism	ko00250	0.00246807
	Carbon metabolism	ko01200	0.00387198
	Taurine and hypotaurine metabolism	ko00430	0.00511055
	Glyoxylate and dicarboxylate metabolism	ko00630	0.00611181
	Isoflavonoid biosynthesis	ko00943	0.00615905
	Porphyrin and chlorophyll metabolism	ko00860	0.00964487
	ABC transporters	ko02010	0.0166262
	Propanoate metabolism	ko00640	0.0168002
	Cyanoamino acid metabolism	ko00460	0.0209701
	Stilbenoid, diarylheptanoid and gingerol biosynthesis	ko00945	0.0265573
	Zeatin biosynthesis	ko00908	0.0328196
	Betalain biosynthesis	ko00965	0.0394811
	Glycosaminoglycan degradation	ko00531	0.0440924
	Tyrosine metabolism	ko00350	0.0450027
TR1 VS TS1	Photosynthesis - antenna proteins	ko00196	1.24584e-09
	Metabolic pathways	ko01100	1.39772e-08
	DNA replication	ko03030	1.30422e-06
	Plant hormone signal transduction	ko04075	8.61757e-06
	alpha-Linolenic acid metabolism	ko00592	9.69298e-06
	Biosynthesis of secondary metabolites	ko01110	1.56297e-05
	Nitrogen metabolism	ko00910	3.34052e-05
	Propanoate metabolism	ko00640	0.000207733
	Benzoxazinoid biosynthesis	ko00402	0.000222237
	MAPK signaling pathway - plant	ko04016	0.000335665
	Carotenoid biosynthesis	ko00906	0.00041009
	Glycerophospholipid metabolism	ko00564	0.0010831
	Flavonoid biosynthesis	ko00941	0.00173059
	Diterpenoid biosynthesis	ko00904	0.00173167
	Circadian rhythm - plant	ko04712	0.00271976
	Zeatin biosynthesis	ko00908	0.00272389
	Anthocyanin biosynthesis	ko00942	0.00330569
	Glucosinolate biosynthesis	ko00966	0.00335385
	Alanine, aspartate and glutamate metabolism	ko00250	0.00338324
	Base excision repair	ko03410	0.00347782
	Brassinosteroid biosynthesis	ko00905	0.00513885
	Starch and sucrose metabolism	ko00500	0.00676863
	Mismatch repair	ko03430	0.0178183
	Cutin, suberine and wax biosynthesis	ko00073	0.0235242
	Plant-pathogen interaction	ko04626	0.023987
	Glyoxylate and dicarboxylate metabolism	ko00630	0.0250261
	ABC transporters	ko02010	0.0262117
	Betalain biosynthesis	ko00965	0.0320853
TR2 VS TS2	Betalain biosynthesis	ko00965	0.0004087
	Photosynthesis - antenna proteins	ko00196	0.00100834
	Biosynthesis of secondary metabolites	ko01110	0.00135523
	Plant-pathogen interaction	ko04626	0.00321334
	Phenylpropanoid biosynthesis	ko00940	0.00661442
	Brassinosteroid biosynthesis	ko00905	0.0119264
	Metabolic pathways	ko01100	0.0158561
	ABC transporters	ko02010	0.0175923
	Tropane, piperidine and pyridine alkaloid biosynthesis	ko00960	0.0196371
	Glyoxylate and dicarboxylate metabolism	ko00630	0.0249851
	Cutin, suberine and wax biosynthesis	ko00073	0.0294066
	Sesquiterpenoid and triterpenoid biosynthesis	ko00909	0.0402643
	Ether lipid metabolism	ko00565	0.0422432
TR1 VS TR2	Plant-pathogen interaction	ko04626	7.03726e-12
	MAPK signaling pathway - plant	ko04016	1.1971e-10
	Circadian rhythm - plant	ko04712	2.39616e-05
	Plant hormone signal transduction	ko04075	9.23302e-05
	Isoflavonoid biosynthesis	ko00943	0.000143245
	Glycerophospholipid metabolism	ko00564	0.000240745
	Cutin, suberine and wax biosynthesis	ko00073	0.000529829
	Anthocyanin biosynthesis	ko00942	0.00218671
	ABC transporters	ko02010	0.00253764
	Glucosinolate biosynthesis	ko00966	0.00498794
	DNA replication	ko03030	0.00577148
	alpha-Linolenic acid metabolism	ko00592	0.00832217
	Zeatin biosynthesis	ko00908	0.0130278
	Glycosaminoglycan degradation	ko00531	0.0224932
	Ether lipid metabolism	ko00565	0.0279309
	Glyoxylate and dicarboxylate metabolism	ko00630	0.0350214
	Flavonoid biosynthesis	ko00941	0.0373204
	Carotenoid biosynthesis	ko00906	0.049799
TS1 VS TS2	Photosynthesis - antenna proteins	ko00196	4.09562e-13
	Metabolic pathways	ko01100	1.68704e-12
	Biosynthesis of secondary metabolites	ko01110	3.37297e-12
	alpha-Linolenic acid metabolism	ko00592	1.06665e-06
	Propanoate metabolism	ko00640	1.62721e-05
	Nitrogen metabolism	ko00910	3.5565e-05
	Phenylpropanoid biosynthesis	ko00940	5.74644e-05
	Alanine, aspartate and glutamate metabolism	ko00250	9.273e-05
	Tyrosine metabolism	ko00350	0.000170582
	Diterpenoid biosynthesis	ko00904	0.000339295
	Cutin, suberine and wax biosynthesis	ko00073	0.000400128
	ABC transporters	ko02010	0.000901255
	Isoquinoline alkaloid biosynthesis	ko00950	0.00119245
	Benzoxazinoid biosynthesis	ko00402	0.00167386
	Brassinosteroid biosynthesis	ko00905	0.00369353
	Glucosinolate biosynthesis	ko00966	0.00440173
	Zeatin biosynthesis	ko00908	0.00461348
	Betalain biosynthesis	ko00965	0.0050757
	Circadian rhythm - plant	ko04712	0.00566934
	Glyoxylate and dicarboxylate metabolism	ko00630	0.00895321
	Starch and sucrose metabolism	ko00500	0.00928662
	Amino sugar and nucleotide sugar metabolism	ko00520	0.0101586
	Steroid biosynthesis	ko00100	0.0145228
	Glycosphingolipid biosynthesis - ganglio series	ko00604	0.01734
	Cysteine and methionine metabolism	ko00270	0.0265077
	Butanoate metabolism	ko00650	0.0382778
	Glycerophospholipid metabolism	ko00564	0.0402313
	Isoflavonoid biosynthesis	ko00943	0.0414332
	Carbon metabolism	ko01200	0.0460354

## Sheet: TableS10
TableS10. Top 10 genes and metabolites that significantly influence each other in the transcriptome and metabolome
Gene-ID	metabolite-ID	Class I
LOC110725156	Lmhp005872	Alkaloids
LOC110687300	Zjlp100904	Terpenoids
LOC110736963	Lmsp002982	Flavonoids
novel.12120	Zbyp002402	Phenolic acids
LOC110688274	Lmlp003161	Alkaloids
LOC110706673	MWS3166	Amino acids and derivatives
LOC110731840	Lmhp112042	Lipids
LOC110708210	mws0359	Lipids
LOC110738900	pmb2640	Lipids
LOC110698649	Zmyn005252	Lipids

[truncated: 4 more sheets: TableS11, TableS12, TableS13, TableS14]
